1 **Full title:**

2 **Glucose controls co-translation of structurally related mRNAs *via***  
3 **the mTOR and eIF2 pathways in human pancreatic beta cells**

4

5 **Short title:**

6 **Glucose controls co-translation of mRNAs in human pancreatic beta cell**

7

8 Manuel Bulfoni<sup>1†</sup>, Costas Bouyioukos<sup>1†</sup>, Albatoul Zakaria<sup>2</sup>, Fabienne Nigon<sup>1</sup>, Roberta Rapone<sup>1,3</sup>,  
9 Laurence Del Maestro<sup>1</sup>, Slimane Ait-Si-Ali<sup>1</sup>, Raphaël Scharfmann<sup>2</sup> and Bertrand Cosson<sup>1\*</sup>

10 <sup>1</sup> Université de Paris, CNRS UMR7216 Epigenetics and Cell Fate, Paris F-75013, France

11 <sup>2</sup> U1016 Inserm, Institut Cochin, 75014 Paris.

12 <sup>3</sup> Current address: Institut de Biologie de l'École Normale Supérieure ENS. CNRS UMR8197. Inserm  
13 U1024. 75005 Paris, France.

14

15

16 \* To whom correspondence should be addressed. Tel: +33 (0)1 57 27 89 66; Fax: +33 (0)1 57 27 89  
17 12; Email: [bertrand.cosson@u-paris.fr](mailto:bertrand.cosson@u-paris.fr)

18 † The authors wish it to be known that, in their opinion, the first two authors should be regarded as  
19 Joint First Authors

20

21 **ABSTRACT**

22 Pancreatic beta cell response to glucose is critical for the maintenance of normoglycemia. A strong  
23 transcriptional response was classically described in rodent models but, interestingly, not in human  
24 cells. In this study, we exposed human pancreatic beta cells to an increased concentration of glucose  
25 and analysed at a global level the mRNAs steady state levels and their translationalability. Polysome  
26 profiling analysis showed an early acute increase in protein synthesis and a specific translation  
27 regulation of more than 400 mRNAs, independently of their transcriptional regulation. We clustered  
28 the co-regulated mRNAs according to their behaviour in translation in response to glucose and  
29 discovered common structural and sequence mRNA features. Among them mTOR- and eIF2-  
30 sensitive elements have a predominant role to increase mostly the translation of mRNAs encoding for  
31 proteins of the translational machinery. Furthermore, we show that mTOR and eIF2 $\alpha$  pathways are  
32 independently regulated in response to glucose, participating to a translational reshaping to adapt  
33 beta cell metabolism. The early acute increase in the translation machinery components prepare the  
34 beta cell for further protein demand due to glucose-mediated metabolism changes.

35

36 **AUTHOR SUMMARY**

37 Adaptation and response to glucose of pancreatic beta cells is critical for the maintenance of  
38 normoglycemia. Its deregulation is associated to Diabetic Mellitus (DM), a significant public health  
39 concern worldwide with an increased incidence of morbidity and mortality. Despite extensive research  
40 in rodent models, gene expression regulation in response to glucose remains largely unexplored in  
41 human cells. In our work, we have tackled this question by exposing human EndoC-BH1 cells to high  
42 glucose concentration. Using polysome profiling, the gold standard technique to analyse cellular  
43 translation activity, we observed a global protein synthesis increase, independent from transcription  
44 activity. Among the specific differentially translated mRNAs, we found transcripts coding for ribosomal  
45 proteins, allowing the cell machinery to be engaged in a metabolic response to glucose. Therefore,  
46 the regulation in response to glucose occurs mainly at the translational level in human cells, and not  
47 at the transcriptional level as described in the classically used rodent models.

48 Furthermore, by comparing the features of the differentially translated mRNAs, and classifying them  
49 according to their translational response, we show that the early response to glucose occurs through

50 the coupling of mRNA structure and sequence features impacting translation and regulation of  
51 specific signalling pathways. Collectively, our results support a new paradigm of gene expression  
52 regulation on the translation level in human beta cells.

53

## 54 INTRODUCTION

55 Pancreatic islet  $\beta$ -cells play a pivotal role in the maintenance of normoglycemia by synthesizing,  
56 storing and secreting insulin. Glucose uptake and metabolism are essential for regulation of glycemia  
57 by stimulating insulin secretion and triggering specific gene expression. These processes have been  
58 widely studied in rodent since 1970s (1). Due to the long-standing difficulties to generate a human  
59 cellular model (2), or to access to primary human islet preparations derived from deceased donors (3),  
60 there is a scarcity of results obtained from human cells. In addition, despite many similarities, there  
61 are major differences between human and rodent models such as the copy number of *insulin* genes,  
62 the expression of different transcription factors in glucose-stimulated insulin secretion, the architecture  
63 of the Islet of Langerhans with functional implication and, finally, the susceptibility to  $\beta$ -cell injury (2).  
64 Moreover, concerning glucose-dependent gene expression regulation, recent transcriptome studies  
65 have demonstrated important differences in expression levels between human and rodent cell lines.  
66 In the rat  $\beta$ -cell line INS-1, more than 3700 genes were significantly affected in response to glucose  
67 (4). In contrast, a recent transcriptome study of the first human  $\beta$ -cell line (EndoC-BH1), able to  
68 secrete insulin in response to glucose stimulation (5), showed that only a scarce number of genes  
69 were modified at the mRNA level for cells exposed for eight hours either to high or low glucose  
70 concentrations (6). Accordingly, a previous report on donor human islet treated similarly during  
71 twenty-four hours (7) reported that the expression of only 20 genes was affected. Taken together,  
72 these findings highlight a considerable difference in gene expression regulation at transcriptional level  
73 between human and mouse pancreatic  $\beta$ -cell.

74 Glucose regulation has also been addressed at post-transcriptional level in rodent models since the  
75 70s. In particular, attention was focused on the regulation of glucose-induced pro-insulin synthesis (8–  
76 10) reporting that the first cellular response to replenish insulin was entirely mediated at translational  
77 level without affecting mRNA abundance (8). Beside *pro-insulin*, synthesis of other proteins was also  
78 stimulated, but these proteins were not identified. A translome study addressed this issue in mouse

79 insulinoma 6 (MIN6) cell line by polysome profiling (11) and identified 313 mRNAs, for which the  
80 association with polysomes was changed by at least 1.5 times. Interestingly, in low glucose the  
81 Integrated Stress Response (ISR) mediates eIF2 phosphorylation, promoting translation of a group of  
82 mRNAs including b-zip transcription factors such as ATF4, CHOP (DDIT3), and c-Jun. The translation  
83 of these mRNAs was reduced upon glucose increase and eIF2 dephosphorylation, linking regulatory  
84 pathway activity and protein expression regulation (11).

85 To date, no translome studies have been made on human  $\beta$ -cells to address glucose induced post-  
86 transcriptional regulation. In this work, we exposed human pancreatic  $\beta$ -cells exhibiting glucose-  
87 inducible insulin secretion (12) to high glucose concentrations for 30 min to observe the early cellular  
88 response. We observed a global protein synthesis increase, independent from transcription regulation.  
89 We identified 402 mRNAs that are differentially translated in response to glucose and identified  
90 different groups of co-regulated transcripts. We found mTOR and eIF2-sensitive elements in a  
91 majority of them and, accordingly, we found that both pathways activate translation of specific mRNAs  
92 in response to glucose. Upregulated genes are mainly coding for ribosomal proteins, increasing the  
93 translation machinery potential, allowing the cell machinery to be engaged in a metabolic response to  
94 glucose.

95

## 96 **RESULTS**

### 97 **Glucose induces an acute increase in protein synthesis in human $\beta$ -cells.**

98 To monitor and quantify the translation activity in response to glucose, we performed a polysome  
99 profiling analysis on a functional human  $\beta$ -cell line able to produce insulin in response to glucose  
100 (EndoC- $\beta$ H2 cells, see Material and Methods). Polysome profiling is a gold standard technique to  
101 analyze cellular translation activity. Ribosome complexes of different densities are separated on a  
102 sucrose gradient consistent with the number of ribosomes. Briefly, EndoC- $\beta$ H2 cells were cultured for  
103 24 hours in 0.5 mM glucose and then treated for 30 min with either 0.5 mM or 20 mM glucose.  
104 Polysome profiling showed that increasing glucose to 20 mM triggered an important increase in the  
105 content of polysomes in parallel to a decrease of the monosomes peak (80S) (Fig. 1A).  
106 Polysome/monosome ratio was raised 2 times, which is classically observed with a global increase in

107 protein translation. This translation upregulation was confirmed by <sup>35</sup>S-Met incorporation (Supp. Fig  
108 1A).

109 We next quantified whether the global increase in translation was associated to a modification in  
110 mRNA steady state levels by genome-wide transcriptome analysis. As illustrated by the MA plot in Fig.  
111 1B, global mRNA levels were not significantly affected by a 30 min glucose treatment. Only 16  
112 transcripts (Supp. Fig 1B) were found to be significantly affected, 7 of them coding for histone proteins.  
113 However, these variations are low, with a fold change of less than 2-fold. We validated this result by  
114 RT-qPCR showing that *Histone1H3C* and *Histone1H3D* mRNAs increased from 30 min after glucose  
115 shift (Supp. Fig.1C), in an extent similar to that observed by RNAseq (log FC = 0.7 at 30 min, Supp.  
116 Fig 1B, corresponding to FC = 1.6). Conversely, the abundance of mRNAs such as, *PTPRN*, *CHGA*  
117 or *CCNG1* was not significantly affected even after 1h or 2h after the glucose shift. This finding is in  
118 agreement with the results described in Richards et al., showing that even 8 hours after glucose  
119 increase, only a scarce number of genes were modified at the mRNA level (6). Hence, the global  
120 increase in protein synthesis is virtually independent from transcription regulation.

121 In conclusion, we show here for the first time that human beta cells respond to glucose by a rapid and  
122 important increase in mRNA translation, which is virtually independent of changes in the  
123 transcriptome.

124

## 125 **Glucose regulates translation rates of mRNAs involved in the insulin secretion pathway and in** 126 **the translation machinery**

127 We next studied genes whose translation rates are regulated in response to glucose by sequencing  
128 the mRNAs associated with monosomes and polysomes (Fig. 1A, see Materials and Methods). The  
129 commonly adopted strategy to identify translated genes is usually to consider mRNAs associated with  
130 more than 3 ribosomes (13), but each fraction from monosomes to heavy polysomes could also be  
131 sequenced (14). To obtain a good compromise between resolution and sensitivity, we analyzed  
132 separately the monosomes (80S), light polysomes (2-4 ribosomes per mRNA), and heavy polysomes  
133 (> 4 ribosomes per mRNA). Accordingly, fractions were pooled (see Fig. 1A) to collect monosomes

134 (fractions 5-6), light polysomes (fractions 7-9) and heavy polysomes (fractions 10-13) before RNA  
135 sequencing.

136 Differential analysis using the limma package (15) highlighted that the abundance of 235 mRNAs in  
137 heavy polysomes and 218 in light polysomes was significantly changed upon glucose shift (adjusted  
138 p-value < 0.05 and logFC > 0.5, Fig 1C and 1D), but not in monosomes (Fig. 1E). These changes do  
139 not correlate with a significant difference in mRNA total level (Fig. 1B). As expected from the global  
140 increase in translation we observed in high glucose (Fig. 1A), most of the identified transcripts were  
141 enriched in polysomes (Fig. 1F): 164 in the heavy polysomes, 131 in the light polysomes, 49 common  
142 to both. Thus, only a minority of transcripts, 58 in total, were downregulated. Interestingly, from the 16  
143 transcripts increased in RNA abundance (Fig 1B) only four have been found increased in polysomal  
144 fractions (Fig. 1F and Supp. Fig. 1A). Except for these four genes, the variation for each transcript  
145 observed in polysomal fractions corresponds to a specific translational regulation independently of  
146 any variation in mRNA abundance and, consequently, of any transcriptional regulation.

147 Continuing the investigation of differentially translated genes, we proceed by assessing if glucose  
148 stimulation modified the biosynthesis of insulin and of known major factors involved in insulin  
149 maturation and secretion pathway. We focused on gene products whose biosynthesis was reported to  
150 be enhanced in response to glucose in rodent cells, such as Protein Tyrosine Phosphatase Receptor  
151 Type N (PTPRN) (16), chromogranin A (CHGA) (17), and pro-hormone convertases 1/3 (PC1/3) (18).  
152 In heavy polysomes, *PTPRN* mRNA was enriched while *CHGA* mRNA was reduced (Fig. 1G and  
153 Supp. Fig. 2C and 2D). Interestingly, the relatively short *Insulin* transcript associates mainly with light  
154 polysomes (Fig. 1G), as observed previously in a mouse cellular model (11).

155 Our data show that the human EndoC- $\beta$ H2 beta cell line incubated with high glucose for 30 min  
156 quickly modify the translation rates of at least two mRNAs that code for proteins involved in the insulin  
157 secretion pathway. In contrast, We did not find any particular expression difference in the dot plot for  
158 *Insulin* and *PC1/3* mRNAs (Fig. 1G), and accordingly we did not find these genes as differentially  
159 translated in our conditions.

160 Gene Ontology (GO), gene set and REACTOME pathway enrichment analyses were performed for all  
161 the Differentially Translated Genes (DTGs). Figure 2 illustrate the gene-concept plots (cnetplots) of  
162 each ontology term and all its associated genes of the top 10 enriched categories for molecular

163 functions (MF, Fig. 2A) and biological processes (BP, Fig. 2B). Cnetplots are an informative way to  
164 represent the relationships between different ontology terms in a graph of all the associated genes  
165 together with the logFC for each gene. It is evident that the majority of the translationally upregulated  
166 genes (red nodes) are enriched in GO terms related to the biosynthesis and metabolism of proteins,  
167 rRNAs and to the translation machinery (Fig. 2). Supp. Fig. 2E illustrates the top 20 REACTOME  
168 pathways that are enriched in DTGs which further corroborate the finding of the GO analysis (Fig. 2).

169 In conclusion, our results show that glucose concentration changes modulate translation rate of  
170 specific mRNAs of the insulin secretion pathway and promotes the synthesis of the translation  
171 machinery components.

172

### 173 **Differentially translated mRNAs in response to glucose share unique structural and sequence** 174 **features**

175 It might be tempting to explain the translation modulation of specific mRNAs in response to glucose  
176 by a simple global translation increase. To test this, we calculated the translation ratio, defined as the  
177 abundance ratio of the translating mRNA in mono/polysome fractions to total mRNA regarding a  
178 certain gene (see Material and Methods for detail), for the most translated transcripts for each gene  
179 (Supp. Table 1), and then asked if the 200 most translated mRNAs are the same in low and high  
180 glucose (Fig. 3A), by ranking them according to the translation ratio. We found that around 40% (76)  
181 of the best translated transcripts in high glucose (Fig. 3A, grey circle) were not among the best  
182 translated in low glucose (Fig. 3A, blue circle). Furthermore, 80% of the mRNAs that display the major  
183 differences in ranking (Fig. 3A, white circle) are not found in the 200 top translated mRNAs in high or  
184 low glucose. The cellular response to glucose is therefore not just a simple increase in overall  
185 translation.

186 Translational adaptation to glucose seems therefore to be a complex process. Thus, we further  
187 investigated potential association between the differential translation regulation and specific sequence  
188 and structural features of the DTGs. To this end, we have classified differences in translation ratios  
189 between high and low glucose to 3 mRNA groups: 147 mRNAs with higher translation ratio in high  
190 glucose, 137 with a lower translation ratio in high glucose and a control category of 320 mRNAs with

191 no significant change between high and low glucose. The most translated transcript of each of these  
192 604 genes was analysed by our in-house developed software (detailed in Materials and Methods) to  
193 retrieve sequence information from ENSEMBL database and identify structural features. Several  
194 characteristics appear in the statistical analysis of the features (Fig. 3B-F and Supp. Fig. 3). Among  
195 them, the minimum folding energy normalized over the length of the sequence (MFE per BP) is an  
196 interesting measure to estimate the complexity of an mRNA untranslated region (UTR) structure.

197 Transcripts with higher translation ratio difference between high and low glucose appear to have  
198 statistically significant shorter open reading frames (ORFs), and shorter and less complex UTRs.  
199 Conversely, transcripts that are down regulated have longer ORFs and more structured 3'UTR since  
200 their MFE per BP distribution slightly decreases (Fig. 3 B-F).

201 These results indicate that the sequence and structural features we have used allow the classification  
202 and characterization of the highly translated mRNAs; so they provide a good tool to dissect the  
203 different classes of translational behaviour of transcripts in mono-, light- and heavy- polysomes.  
204 Motivated by that, we proceeded with the dissection of this behaviour and the sequence-structure  
205 characterization of the different transcript classes.

206

### 207 **Differentially translated mRNA clusters display specific mRNA features**

208 To group the translationally co-regulated transcripts, we clustered the 402 differentially translated  
209 mRNAs we identified previously (Fig. 1F) based on their behaviour between monosomes, light, and  
210 heavy polysomes. To this end, we calculated for each mRNA the log<sub>2</sub> ratio of the average abundance  
211 in high over low glucose condition for each of the three ribosomal fractions. The log ratios matrix was  
212 then subjected to a modelling clustering method able to determine in an unsupervised way the best  
213 model that characterizes the data (19). The model generated six clusters, which highlighted six  
214 different types of behaviours (Fig. 4A, coloured bars with the cluster number). Genes of the top cluster  
215 (n°1, seagreen bar) showed a clear pattern for 73 mRNAs shifting from the monosomes to polysomes  
216 (both light and heavy), which is the expected behaviour for a mRNA with increased translation.  
217 Cluster n°6 (102 mRNAs) presented a behaviour similar to cluster 1 with an increase of mRNAs in  
218 heavy polysomes but without any rise in the light polysomes. These transcripts move from the



219 monosomes to the heavy polysomes fraction and correspond to transcripts whose translation is  
220 greatly increased. Instead, the mRNAs of clusters 2 and 3 (90 and 79 mRNAs, respectively) showed  
221 increased mRNA levels for light/heavy and monosome/light polysomes, respectively. We reasoned  
222 that at low glucose concentration these mRNAs are associated with small complexes that have a  
223 density smaller than one ribosome and correspond to mRNAs newly recruited to the translation  
224 machinery. Finally, clusters 4 and 5 (37 and 21 mRNAs, respectively) collected all the mRNAs whose  
225 levels in the polysome fractions decreased upon glucose stimulation, which might reflect a decrease  
226 in their translation. The difference between these two clusters comes from the fact that the decrease  
227 is observed in light polysomes for cluster 4 and in heavy polysomes for cluster 5.

228 Based on the link between features and behaviours that we observed (Fig. 3), we hypothesized that  
229 the different patterns observed for the clusters could be a consequence of *cis*-regulatory elements  
230 present on the mRNAs which could serve as binding sites for *trans*-acting factors such as RNABPs  
231 and miRNAs. To investigate this possibility, we calculated a series of mRNA features for the most  
232 abundant transcript for each gene. We developed an RNA feature extraction tool (see Material and  
233 Methods) that is able to download, from the ENSEMBL database bioMart (20), the transcript  
234 sequences with additional annotations and calculate sequence and structural properties (see Supp.  
235 Table 2 for the full table of results). We proceeded by grouping these mRNA features between the 6  
236 clusters of different translation behaviour identified by the model clustering approach (Fig. 4 B-I, the  
237 full ensemble of the statistical analysis of differences between groups, including the results of all the  
238 Kruskal-Wallis H-test and its associated p values are available in supplementary Supp. Fig. 4).  
239 Strikingly, the length of the coding sequence (CDS) of cluster 1 mRNAs was significantly shorter,  
240 while in cluster 2 the CDS were longer (Fig. 4B). Next, we analysed the length of the UTRs (Fig. 4C-  
241 D). Notably, there was a tendency for mRNAs of cluster 1 to have shorter 5' and 3' UTRs than the  
242 other clusters. Cluster 4 and 6 showed similar tendencies towards shorter 5' UTRs (Fig. 4C). Cluster 4,  
243 that corresponds to mRNAs whose translation decreases in response to glucose, contained longer 3'  
244 UTRs (Fig. 4D).

245 We next analysed the GC-richness of the 5' and 3'UTRs, as a proxy to determine the complexity of  
246 secondary structures formed by the mRNA UTRs. Cluster 2 and 3 contained mRNAs with higher GC  
247 content on both 5' and 3' UTRs than the others (Fig. 4E-F). In accordance, clusters 2 and 3 contained

248 mRNAs with more structured 5' and 3' UTRs than the other clusters (Fig 4G-H). In addition, cluster 5,  
249 the cluster with the underrepresented mRNAs in the heavy polysome fraction, also appears to have  
250 the next higher GC content and lowest MFE per BP on its 3'UTR (Fig. 4F,H), indicating that the 5'UTR  
251 structural and sequence complexity affects the translation regulation.

252 In addition to the UTR structure, we found a tendency towards a lower Codon Adaptation Index (CAI)  
253 for cluster 4 and cluster 6 (Fig. 4I). Since CAI is associated with slowest translation rates this finding  
254 could explain at least in part the accumulation of transcripts in monosomes (cluster 6) or light  
255 polysomes (cluster 4) rather than in heavy polysomes in low glucose (Fig. 4A).

256 We then searched for functional motifs in the UTRs by interrogating the UTRdb  
257 (<http://utrdb.ba.itb.cnr.it/>), (21), and we found already characterized RNA binding motifs in the UTRs of  
258 the mRNAs which are differentially translated (Supp. Fig. 5). Interestingly, we found TOP motifs (5'-  
259 terminal oligopyrimidine (TOP) (22)) mostly represented in cluster 1 and 6 (Fig. 5A), and also uORFs,  
260 and IRES features (Fig. 5B). It is interesting to note that uORF and TOP features are mutually  
261 exclusive (Fig.5B), meaning that these features are used independently to differentially regulate  
262 mRNA translation. This finding indicates two different potential modes of translation regulation from  
263 two independent mechanisms.

264 Taken together, the results suggest that the translational regulation of differentially translated mRNAs  
265 upon glucose concentration shift is strongly associated with, and can be characterized by, specific  
266 sequences as well as structural features on the UTRs and coding regions of these mRNAs.

267

268 **Clustering reveals that specific pathway regulators are co-regulated in response to glucose,**  
269 **and that TOP motifs are preponderant to upregulate the translation machinery components.**

270 Next, we performed gene ontology enrichment analyses, using the R package ClusterProfiler (23), in  
271 order to assess if the mRNAs belonging to the different clusters were implicated in specific biological  
272 processes. Cluster 1 and 6 were enriched for categories related to translation but especially for ER-  
273 related translation (Fig. 6A-B). Cluster 4 (Fig. 6C), which contained the translationally repressed  
274 mRNAs in high glucose, was enriched in mRNAs coding for proteins involved in regulation of  
275 metabolic processes and cell death. In particular, genes involved in tricarboxylic acid, acyl-CoA, and

276 thioester metabolisms were found to be enriched in cluster 4. Cluster 5 with also repressed transcripts  
277 in high glucose was enriched for categories related to response to starvation and growth factors (Fig.  
278 6D), including mRNAs coding for b-zip transcription factors such as ATF4, DDIT3(CHOP), and c-Jun  
279 (Supp. Table 2) that had a similar behaviour in mouse beta cell (see introduction,(11) ).

280 We thus investigated if ribosomal proteins or translation factors were found in clusters 1 and 6. We  
281 found that cluster 1 contained 56 mRNAs coding for ribosomal proteins (Supp. Table 3, RPL and  
282 RPS), corresponding to 70% of the total number of RP transcripts, while cluster 6 contained 13  
283 mRNAs coding for eukaryotic translation factors of which 4 were elongation factors (eEF1A1, eEF1A2,  
284 eEF1B2, eEF2) and the remaining were initiation factors (eIF2A, eIF2S3, eIF3E, eIF3F, eIF3G, eIF3H,  
285 eIF3L, eIF4A2, eIF4B) (Supp. Table 3, eIFs and eEFs). These mRNAs are known to contain the TOP  
286 motif (TOP-RNAs, (22,24,25)), that we found enriched in the differentially regulated mRNAs (Fig. 5A),  
287 mostly in cluster 1 and at a lesser extent in cluster 6. Therefore, we compared the mRNAs found in  
288 cluster 1 and 6 with the list of mRNAs that were previously reported or proposed to be TOP-RNAs in  
289 three already published studies (22,24,25) (Supp. Table 4). Overlap between the three set of genes  
290 showed that cluster 1 contained 59 (58%) of the known TOP-RNAs while cluster 6 contained 20 (20%,  
291 Fig. 6D). 80% of the mRNAs of cluster 1 are known to be TOP-RNAs, one hypothesis is that the  
292 similar behaviour of the cluster1 mRNAs is due to their TOP motif. We calculated the TOP local score  
293 for the 14 remaining mRNAs and found a similar distribution to cluster 1.

294 In conclusion, we found that translation increased for more than 70% of the mRNAs coding for  
295 ribosomal proteins, and also for genes involved in specific metabolic processes, response to growth  
296 factors or that regulate cell death.

297

### 298 **mTOR and eIF2alpha pathways are regulated upon glucose induction**

299 We next sought to identify the molecular pathways driving such translation regulation in response to  
300 glucose in human beta cells. Our data unraveled a group of uORF-containing mRNAs that are  
301 translationally regulated upon glucose induction. uORF-mediated translation mechanisms involve the  
302 phosphorylation of eIF2 complex alpha subunit (eIF2 $\alpha$ ) on Ser51, which inhibits the assembly and  
303 recycling of the translational ternary complex (eIF2-GTP-Met-tRNA<sub>i</sub>), and results in a reduction in

304 translation initiation. We therefore examined the phosphorylation status of eIF2 $\alpha$ . Western blot  
305 analyses highlighted a dephosphorylation of eIF2 $\alpha$  in response to glucose (Fig. 7A, P-eIF2 $\alpha$ , and  
306 Supp. Fig. 6A for western blot quantification), indicating an increased availability of the ternary  
307 complex. Furthermore, adding the translation inhibitor cycloheximide does not prevent the activation  
308 of eIF2 through dephosphorylation, which is therefore independent of protein neosynthesis. Note that  
309 the amount of poly-A binding protein (PABP), a key post-transcriptional regulator, remains constant.

310 It has been described that glucose deprivation is sensed by aldolases, which cause the formation of a  
311 membrane-associated lysosomal complex, which in turn activates AMP-activated protein kinase  
312 (AMPK) (26). AMPK induces inhibition of mammalian TOR complex 1 (mTORC1) activity by  
313 phosphorylation of the tuberous sclerosis protein 2 (TSC2) tumor suppressor and the mTOR binding  
314 partner Raptor (27,28). Since mTORC1 is a well-known regulator of protein synthesis, we postulated  
315 that upon glucose increase, mTORC1 activation participates in translation upregulation. It is well  
316 established that mTORC1 regulates translation through the modulation of the phosphorylation status  
317 of 4EBP1 (29). Thus, to further validate that mTORC1 signaling is a key player in glucose stimulation,  
318 we checked the phosphorylation status of 4EBP (Fig. 7B and C). At 0.5 mM glucose, 4E-BP displayed  
319 a single band ( $\alpha$ , see Fig. 7C) in western blot that is also visible using an anti phospho-4EBP antibody  
320 showing that 4EBP is at least partly phosphorylated. The P-4EBP/4EBP ratio increased upon glucose  
321 shift, and new 4EBP isoforms are visible (bands  $\beta$  and  $\gamma$ , see profiles in Fig. 7C), corresponding to  
322 hyperphosphorylated 4EBP. We concluded that increase of glucose concentration induced strong  
323 phosphorylation of 4EBP that is known to decrease its affinity for eIF4E, and increases Cap-  
324 dependent translation. We also observed during a proteomic study dedicated to the analysis of the  
325 late response to glucose (4h after glucose increase), that RPS6 was phosphorylated rapidly after  
326 glucose addition, confirming the activation of the mTOR pathway (30). Interestingly, TOP-containing  
327 mRNAs are known to be extremely sensitive to mTOR regulation, that provides an attractive  
328 regulation mechanism to understand the translation upregulation of mRNAs of cluster 1 and 6 (see  
329 Discussion). Furthermore, using rapamycin, a potent inhibitor of mTOR, we observed that eIF2  
330 dephosphorylation was independent of mTOR activation (Fig. 7D). Since we found the kinase eEF2K  
331 in cluster 4, we asked whether eEF2 phosphorylation was affected upon glucose shift. Indeed, we  
332 found a strong reduction of eEF2 phosphorylation (Fig. 7E, and quantification in Supp. Fig. 6D), that is  
333 known to promote its activity for translation elongation. In conclusion, from the structural features of

334 the clusters, we focused on mTOR and eIF2 $\alpha$  pathways that are independently regulated to modulate  
335 translation after a short glucose stimulation, and found also an activation of the elongation factor  
336 eEF2.

337

## 338 **DISCUSSION**

339 We show here that a human pancreatic  $\beta$ -cell line responds to glucose by a specific regulation in  
340 protein synthesis, as revealed by polysome profiling. Interestingly, this increase in translation is  
341 unrelated to the abundance of mRNAs and consequently independent from a transcriptional  
342 regulation. Indeed, from our transcriptome analysis, a 30 min glucose shift had no effect on mRNA  
343 abundance, apart for 16 transcripts that are weakly affected. This result agrees with a microarray  
344 study performed in EndoC- $\beta$ H1 in which only few genes had their mRNA levels affected after 8-hour  
345 of glucose stimulation (6).

346 This context where translational regulation is the major determinant of gene expression prompted us  
347 to perform the first translome study of a human pancreatic  $\beta$ -cell line in response to glucose.

348 Following a 30 min incubation in high-glucose media, we found changes in distribution of 402 mRNAs  
349 in different ribosomal fractions. We report that two important genes involved in the regulation of  
350 secretory granules, *CHGA* and *PTPRN* are translationally co-regulated in human pancreatic  $\beta$ -cells.  
351 The *PTPRN* translation increase was also reported in mouse models (16). *PTPRN* belongs to the  
352 receptor protein tyrosine phosphatase (RPTP) family and regulate basal and glucose-induced insulin  
353 secretion in the mouse MIN6 cell line by increasing, presumably through stabilization, the number of  
354 insulin-containing dense core vesicles (31). Conversely, we found that the association of *CHGA* with  
355 heavy polysomes decreases and consequently its translation is reduced. *CHGA* is a member of the  
356 granin glycoprotein family, and its main intracellular function is to sort proteins into the secretory  
357 granules. *CHGA* is also secreted and generate several cleaved products among which pancreastatin  
358 that have been shown to act in an autocrine and paracrine fashion by inhibiting glucose stimulated  
359 insulin secretion (32).

360

361 We observed, by clustering analysis, that the identified differentially translated mRNAs could be  
362 divided into six groups based on the different changes of their mRNA levels in the three ribosomal

363 sequenced fractions. We thus performed mRNA features analysis to identify possible mRNA features  
364 that could explain the observed different behaviours.

365

366 It is interesting to note that transcripts from cluster 4, that are translationally repressed upon glucose  
367 shift, possess a longer 3'UTR that could contain more regulatory elements, such as miRNA binding  
368 sites. Upregulation of miRNAs have been described in the presence of high glucose (33), thus, it  
369 would be interesting to analyze the modifications in miRNA activity induced by glucose in our human  
370 cellular model.

371

372 We found mRNAs from clusters 4 and 5 better translated in low glucose where eIF2 is  
373 hyperphosphorylated and, less translated in high glucose after dephosphorylation of this initiation  
374 factor. A similar situation has been observed in mice MIN6 beta cells (see introduction, (11)) : in low  
375 glucose eIF2 phosphorylation is mediated by the Integrated Stress Response (ISR) that is  
376 suppressed upon glucose increase. Indeed, we found a similar translational behaviour for ATF4,  
377 DDIT3 and c-Jun transcripts encoding proteins associated with the ISR (34): they all belongs to  
378 cluster 5. Importantly, abundance of these mRNAs decreases upon glucose increase in mouse cells  
379 but their abundance does not vary in our human beta cells.

380 As hyperphosphorylation of eIF2 $\alpha$  is known to favour translation of mRNAs containing uORFs, we  
381 could expect to find uORF-containing mRNAs in cluster 4 and 5, and indeed we found mRNAs  
382 reported to contain uORFs that regulate their translation: the cyclic AMP-dependent transcription  
383 factor (ATF4), the activating transcription factor 5 (ATF5) (35), the transcriptional regulator CHOP (36)  
384 and eEF2K (37).

385 ATF4 was the most translationally downregulated gene identified (log<sub>2</sub> FC -1.5 in heavy polysomes).  
386 Importantly ATF4 is known to be the master regulator of cellular metabolism in response to energetic  
387 stresses and depending on the intensity and length of the stress can either favour cell survival  
388 through upregulation of autophagy related genes and amino acid transporters or enhance expression  
389 of genes involved in apoptotic processes (38). ATF5 has been recently shown to play an important  
390 role in regulating pancreatic  $\beta$ -cells survival (39,40). Despite this decrease in ATF4 and ATF5, a  
391 significant transcriptomic response was not observed for 30 min (this study), or for eight hours (6) of  
392 glucose stimulation. The ATF4 protein increase is classically described to activate transcription of

393 target genes, but this response decreases with time owing to different mechanisms that counteract  
394 ATF4 function (reviewed in (41)). The reduction in ATF4 translation would then allow the cells to  
395 return to basal levels of ATF4 without triggering a transcriptional response.

396 It is interesting to note that after glucose shift, translation inhibition of eEF2K may participate in  
397 translation regulation. eEF2K phosphorylates eEF2, reducing its affinity for ribosomes, resulting in  
398 inhibition of protein synthesis (42). Indeed, we observed a strong dephosphorylation of eEF2, that  
399 would promote the elongation rate of translating ribosomes, participating to the global protein  
400 synthesis increase revealed by the measure of amino-acid incorporation.

401 IRESs are also RNA structures conferring a translational advantage in condition where general  
402 translation is silenced. We searched in the literature if any of the translationally repressed mRNAs  
403 were reported to contain an IRES. We found that the *RRBP1* (Ribosome-binding protein 1, cluster 5)  
404 mRNA has been shown to contain an IRES in its 5' UTR (43). *RRBP1* is a membrane-bound protein  
405 found in the endoplasmic reticulum where it enhances the association of certain mRNAs (44) and play  
406 a role in ER morphology (45). Consequently, *RRBP1* may participate to the reshaping of the  
407 translome upon glucose induction.

408 eIF2 $\alpha$  has been implicated in many physiological translation regulations, being a “funnel factor” where  
409 several signals converge to regulate its phosphorylation at serine 51, which results in cap-dependent  
410 protein translation repression (46), as observed for the ISR. The ISR aimed to protect cells against  
411 various cellular stresses, including viral infection, oxidative stress and ER stress. Interestingly,  
412 phosphorylated eIF2 $\alpha$  is essential to preserve ER integrity in beta cells, and if this mechanism of  
413 protection is compromised, it would contribute to the onset of Diabetic Mellitus (47), a public health  
414 concern worldwide with an increased incidence of morbidity and mortality.

415

416 The metabolism of the beta cell is also reshaped during this early response to glucose (30 mn after  
417 glucose shift) as we found in cluster 4 transcripts coding for proteins involved in regulation of  
418 metabolic processes, cell death and response to growth factors. This translational regulation is  
419 particularly important for genes implicated in tricarboxylic acid (TCA, Krebs Cycle), acyl-CoA, and  
420 thioester metabolisms. Activation of these metabolisms, that are linked by their role in glucose  
421 consumption for energy production, is expected upon translation increase, since protein synthesis is  
422 one of the most energy costly cellular processes (48). In another study done by mass spectrometry to

423 monitor the late response to glucose (4 hours after glucose shift), we have also observed a regulation  
424 in the amount of proteins involved in TCA metabolism and glycolysis (30).

425

426 The mRNAs that showed the strongest increase in the light polysome fraction were grouped in  
427 clusters 2 and 3. Notably these clusters showed a high GC content for both the UTR regions. The GC  
428 content in the 5' UTR could imply a strong dependency toward helicases, and a reduced initiation  
429 activity, which could explain why these mRNAs cannot load enough ribosomes to efficiently access to  
430 heavy polysomes.

431 We have shown that transcripts of the two most highly translated clusters have shorter coding  
432 sequences and shorter and less complex 5'UTRs compared to the rest of the clusters. These features  
433 are characteristic of a special class of mRNAs, the TOP-mRNAs (24), which are all downstream  
434 targets of the mTOR pathway (see below). This class is defined by a 5' terminal oligopyrimidine  
435 (TOP) motif that is indeed enriched in these two highly translated clusters. Also most mRNAs from  
436 cluster 1 are known as TOP-mRNAs. The remaining 14 mRNAs of cluster 1 are most probably new  
437 TOP-RNAs, as suggested by their TOP-local score distribution. Most of the known TOP-RNAs encode  
438 proteins of the translation machinery. Accordingly, gene ontology analysis revealed that cluster 1 was  
439 enriched for categories related to structural components of the ribosomes involved in ER-related  
440 translation. Amongst the 14 new putative TOP-mRNAs that we found up-regulated in these pancreatic  
441 beta cells, we found transcripts coding for proteins acting in ubiquitin binding, cell signalling and  
442 mRNA translation. 20 mRNAs from cluster 6 were also previously reported to be TOP-RNAs (Fig. 6E).  
443 By comparing the mRNA features of the cluster 1 and 6, we noticed similar characteristics that  
444 promote translation activation, such as short and unstructured 5'UTR, but transcripts from cluster 6  
445 have longer CDS. This feature may explain why more ribosomes are loaded on cluster 6 mRNAs (at  
446 least 4 ribosomes) for a constant initiation rate, leading to their depletion from light polysomes and an  
447 enrichment in heavy polysomes.

448 The TOP-RNAs have been described to be regulated by the mTOR pathway in various situations,  
449 such as changes in nutrients and other growth signals (49). Gomez and co-workers (50), studying  
450 glucose stimulation in murine MIN6 cells, concluded that translation regulation by glucose is largely  
451 independent of mTOR but mainly dependent on the availability of the ternary complex regulated by  
452 eIF2 $\alpha$  phosphorylation status.



453

454 In our human cellular model of beta cells, both mTOR activation and eIF2 dephosphorylation  
455 participate to the increase of mRNA translational increase. It is interesting to note that the eIF2 $\alpha$   
456 activation is independent of the mTOR pathway since using rapamycin, a potent inhibitor of the  
457 mTOR pathway, we have still observed the dephosphorylation of eIF2. These pathways regulate  
458 mRNA translation in particular through uORF and TOP features, that are also mutually exclusive on  
459 mRNAs, meaning that these regulations occur independently.

460 We concluded from our results that the glucose-dependent mTOR activation have a crucial  
461 importance for the nature of the transcripts that are regulated by glucose in human cells. As a quick  
462 response to glucose increase, TOP-RNAs allow accumulation of the translation machinery to prepare  
463 the beta cells for further protein demand due to the glucose-mediated metabolism changes.

464

465 Adaptation and response to glucose of pancreatic beta cells is critical for the maintenance of  
466 normoglycemia. Its deregulation is associated with Diabetic Mellitus. Mice models, animal or cell  
467 derived models, have tremendously contributed to our understanding of human biology. All too often,  
468 however, gene expression differ markedly from human cellular models (51). Despite extensive  
469 research in rodent models of beta cells, gene expression regulation in response to glucose remained  
470 largely unexplored in human cells beta cells. Using the only human cell line available of pancreatic  $\beta$ -  
471 cells exhibiting glucose-inducible insulin secretion (12), our results emphasize a remarkable  
472 difference in gene expression regulation in response to glucose that occurs mainly at the  
473 transcriptional level in mouse and at a translational level in human pancreatic  $\beta$ -cell.

474 We have described the first genome-wide translome study of a human pancreatic  $\beta$ -cell stimulated  
475 by glucose, highlighting that the response is translational and virtually independent from changes in  
476 mRNA abundance. Through the recognition of specific mRNA features, the swift translation activation  
477 is particularly efficient to increase translation machinery components. Finally, the combined mTOR  
478 and eIF2 $\alpha$  activation that leads to the translome reshaping governed by specific mRNA features  
479 allows a quick and direct cellular response targeting the translational regulation. These results  
480 constitute a call for a new paradigm of gene expression regulation to better understand  $\beta$ -cell glucose-  
481 mediated metabolism, encouraging biologists and clinicians, whenever possible, to complement their  
482 transcriptomic studies with analysis at the translational or proteomic level.

483

## 484 **MATERIALS AND METHODS**

### 485 **Cell culture and treatment**

486 EndoC-  $\beta$ H2 cells (12) were cultured in low-glucose (5.6 mmol/L) DMEM (Sigma-Aldrich) with 2%  
487 BSA fraction V (Roche-Diagnostics), 50 mmol/L 2-mercaptoethanol, 10 mmol/L nicotinamide  
488 (Calbiochem), 5.5 mg/mL transferrin (Sigma Aldrich), 6.7 ng/mL selenite (Sigma-Aldrich), 100  
489 units/mL penicillin, and 100 mg/mL streptomycin. Cells were seeded at a 40% confluence on plates  
490 coated with Matrigel (1%; Sigma-Aldrich), fibronectin (2 mg/mL; Sigma-Aldrich). Cells were cultured at  
491 37°C and 5% CO<sub>2</sub> in an incubator and passaged once a week when they were 90–95% confluent. For  
492 the polysome profile experiments cells were plated 4 days before treatment to reach 80-90%  
493 confluence the day of experiment. Cells were cultivated for 24 h at 0.5 mM glucose and were then  
494 treated with different concentrations of glucose to obtain media at 5.6 mM, high-glucose media at 20  
495 mM or with low-glucose media at 0.5 mM for 30 min.

496

### 497 **Western blot & antibodies**

498 Protein concentrations were quantified using a Pierce BCA Protein Assay Kit (Thermo Fisher  
499 Scientific). Proteins (20  $\mu$ g) were resolved by SDS-PAGE and transferred to a membrane using an  
500 iBlot2 Gel Transfer Device (Thermo Fisher Scientific). Membranes were incubated with specific  
501 primary antibodies against: phospho-Ser52-eIF2 $\alpha$  (SAB4300221 Sigma), eIF2 $\alpha$  (SAB4500729 Sigma),  
502 tubulin (T9026 Sigma), phospho-4EBP1 (2855 CST), 4EBP1 (9644 CST), Phospho-eEF2 (2331 CST),  
503 eEF2 (2332, CST) and PABP1 (52). Membranes were incubated with species-specific horseradish  
504 peroxidase, or fluorescent-linked secondary antibodies (1:10,000) and visualized on a Odyssey Fc  
505 Dual-mode Imaging System Instrument (LI-COR). Quantification was done (Supp. Fig. 6), and  
506 profiles of the Fig. 7C were obtained, using Image Studio Lite 5.2.5. These data were processed to  
507 generate graphical representation with statistics with Rstudio 1.2.1335.

508

### 509 **Polysome profiling**

510 Polysome profiling was performed on three independent cell cultures both in high (20 mM glucose) or  
511 low (0.5 mM glucose) and each replicate corresponded to approximately 30 million cells. After the  
512 glucose treatment, cells were washed once in ice cold PBS containing 100  $\mu$ g/ml Cycloheximide. The

513 PBS was then removed, the lysis buffer (80 mM KCl, 10 mM Tris pH7.4, 5 mM MgCl<sub>2</sub>, 0.5% Triton X  
514 100, 0.5% Na-Deoxycholate, 40U/  $\mu$ L RNAsin, 1 mM DTT) was added directly to the plate and cells  
515 were scraped and collected. After 10 minutes incubation on ice, the lysates were centrifuge at 10,000  
516 x g for 5 min at 4°C. 10 A254 units of lysates were layered onto a 11 ml 20–50% (wt/vol) sucrose  
517 gradient prepared in the lysis buffer without Triton X-100. The samples were ultra-centrifuged at  
518 39,000  $\times$  g for 2.5 h at 4 °C in a SW41 rotor. The gradients were fractionated in 14 fractions of 0.9 ml  
519 using an ISCO fractionation system with concomitant measurement of A254. Polysome/monosome  
520 ratios were obtained by dividing the area of the polysomal peaks by the area of the peak for the 80S  
521 monosomes. Total lysates and fractions were supplemented with 50  $\mu$ l of 3 M NH<sub>4</sub>Ac, 10 ng of  
522 Luciferase RNA (Promega), 1  $\mu$ l of Glycoblu (Ambion) and 1.2 ml of ethanol. Samples were vortexed  
523 and precipitated overnight at –20 °C. The pellets were collected by centrifugation at 10,000  $\times$  g for  
524 10 min at 4 °C, washed once in 75% ethanol and resuspended in 100  $\mu$ l DEPC-treated H<sub>2</sub>O. Samples  
525 were then treated for 1 hour at 37°C with RQ1 DNase (Promega) to remove possible contamination  
526 by DNA. RNAs were isolated by acid phenol: chloroform and precipitated in 1 ml Ethanol  
527 supplemented with (supplemented with 50  $\mu$ L 3M NaOAc pH 5.2, 1  $\mu$ l of glycoblu). Pellets were  
528 resuspended in 20  $\mu$ l DEPC-treated H<sub>2</sub>O. For sequencing equal volumes of fractions were pooled:  
529 fractions 5-6 (Monosomes), fractions 7-9 (Light polysomes) and fractions 10-13 (Heavy polysomes).  
530 Quality and quantity of pooled fraction was tested by the bioanalyzer RNA 6000 Pico kit (Agilent).  
531 Sequencing was performed by the Genom'ic platform (Institut Cochin, Paris). Libraries were prepared  
532 using TruSeq RNA Library Preparation Kit (Illumina) with rRNA depletion using Ribo-zero rRNA  
533 removal kit (Illumina) following manufacturer's instruction. High-throughput sequencing was  
534 performed using Hiseq 2000 (Illumina) system for 75nt single-end reads.  
535 RNAs were extracted using RNeasy mini kit (Qiagen, ref : 74104), DNase treatment was performed  
536 with RNase-free DNase Set (Qiagen, ref: 79254). Equal volumes of all samples were reverse  
537 transcribed with Superscript IV reverse transcriptase (Life Technologies) for polysomes samples  
538 (Suppl. Fig 2 C and D). Reverse transcripts were obtained using RNA at 1 $\mu$ g/50 $\mu$ l with the kit High  
539 Capacity CDNA RT ( Life Technologie ref: 4368814) for total RNA samples (Suppl. Fig. 1C). qPCR  
540 was done with GoTaq® qPCR Master Mix (Promega ref : A602) on ViiA 7 Real-Time PCR System  
541 (Thermo Fisher Scientific). DNA contamination was assessed omitting the RT, no significant signal  
542 was obtained. Custom primers were designed with the tool developed by Integrated DNA

543 technologies (IDT, <https://eu.idtdna.com/scitools/Applications/RealTimePCR/>), and their efficiency  
544 was determined following serial dilutions of cDNA samples. Primer sequences: PTPRN, Fw (5'-3'):  
545 GTCTCCGGCTGCTCCTCT, Rv (5'-3'): GCCTGCGGTCAAATAGACA; CHGA, Fw (5'-3');  
546 CAAACCGCAGACCAGAGG, Rv (5'-3'); TCCAGCTCTGCTTCAATGG; Cyclophilin-A primer  
547 sequences used for normalization, Fw (5'-3'): ATGGCAAATGCTGGACCCAACA, Rv (5'-3'):  
548 ACATGCTTGCCATCCAACCACT; CCNG1, Fw (5'-3'):GATATCGTGGGGTGAGGTGA, Rv (5'-  
549 3'):TCAGTTGTTGTCAGTACCTCTATCATC; Hist1H3C, Fw (5'-3'): GCTTGCTACTAAAGCAGCCC  
550 Rv (5'-3'): AGCGCACAGATTGGTGTCTTC; Hist1H3D, Fw (5'-3'): CCATTCCAGCGTCTAGTCCG, Rv  
551 (5'-3'): TCTGAAAACGCAGATCAGTCTTGTPRN.

552

### 553 **Bioinformatic analysis of Transcriptome and Polysome sequencing**

554 Sequencing libraries were prepared from three biological replicates for both conditions (0.5 mM and  
555 20 mM glucose). We prepared triplicates for high and low glucose conditions to produce RNA-seq  
556 libraries containing between 16-18 million reads for transcriptome and 8-14 million reads for  
557 polysomes pools. Almost 60% of reads on average were uniquely mapped to the human genome  
558 (Supp. Fig. 1D and 2A). Reads mapped to genes annotated as “protein coding genes” were kept for  
559 further analysis. Lowly expressed genes, frequently associated with high variability between replicates,  
560 were discarded. Samples from different conditions were grouped together by hierarchical clustering  
561 and PCA (Supp. Fig. 1E and 2B), ensuring reproducibility of our replicates. As described below, we  
562 thereafter proceeded with differential gene expression analysis using the limma R package (15).

#### 563 Pre-processing

564 Raw fastq file obtained from the sequencer were firstly checked for their quality using FastQC and  
565 reporting with MultiQC v1.6 (53). No reads were discarded nor trimmed.

#### 566 Mapping, read counts and TPM calculation

567 Quality controlled reads were then mapped to the human genome (GRCh38 from Ensembl 92) using  
568 STAR 2.6 (54) by using the parameter --quantMode GeneCounts to generate gene counts tables.  
569 STAR aligner was further instructed to generate an output (--quantMode TranscriptomeSAM) suitable  
570 as an input for RSEM (55). RSEM reports tables with transcript per million (TPM) for genes and  
571 mRNA isoforms (56). For all the rest of downstream analyses, the tables were filtered to retain only  
572 the genes which are annotated as protein coding in the Ensembl 93 annotation tables.

### 573 Filtering of lowly expressed genes

574 Gene counts table were transformed in log CPM (Counts per Million base). Genes whose CPM values  
575 were smaller than 1 at least in one sample were discarded. Then a customized R function further  
576 filtered genes whose coefficient of variation (defined as the ratio of the standard deviation over the  
577 mean) within replicates was lower than 0.75 and the mean CPM expression was higher than 4. As a  
578 first step for quality control of our datasets we performed a hierarchical clustering analysis by using  
579 the TPM tables for each sample. Clustering was performed on the Euclidean distance matrix and the  
580 Ward's minimum variance method was used for forming clusters (option Ward.D2 in the hclust  
581 function of R).

### 582 Differential expression analysis and clustering

583 Analyses were performed using the limma (15) Bioconductor package. Differentially expressed genes  
584 (DEGs) or translated genes (DTGs) were identified by fitting linear models between all the pairs of the  
585 three polysome profile fractions applying the eBayes method to calculate p-values. Only genes with  
586 adjusted p-values for multiple testing  $\leq 0.05$  were selected. A separate list containing the TPM  
587 (transcripts per million reads) values was kept for downstream analysis. The average expression of  
588 each gene was calculated in each fraction (monosomes, light polysome and heavy polysomes) and  
589 condition (low or high glucose). Then for each fraction and gene the logarithmic ratio of means of high  
590 glucose over low glucose was calculated (log ratio of mean TPM expression). The generated log ratio  
591 matrix was then used in our integrative clustering approach which comprised the application of 3  
592 clustering algorithms. Hierarchical clustering (hclust), k-means clustering (kmeans) and a model  
593 based bayesian approach clustering (mclust) were applied to the log ratio matrix of translation. Based  
594 on the silhouette measure for each clustering we evaluated that the mclust method represents better  
595 the structure of the translation data set.

### 596 mRNA features collection

597 We developed an in-house software for the retrieval and calculation of an array of sequence features  
598 for a given set of genes, The RNA features extraction tool is freely accessible in the GitHub repository  
599 ([https://github.com/parisepigenetics/rna\\_feat\\_ext](https://github.com/parisepigenetics/rna_feat_ext)). The tool searches for either the most well  
600 annotated transcript for each gene in the gene list or it can also choose the most expressed transcript  
601 if a transcript abundance file is provided (e.g. the output of tools like RSEM or StringTie). We used the  
602 latter possibility using the average of all the polysomal samples. For each transcript, the tool extracts

603 different mRNA features using the bioMart API. The mRNA features that we extracted were: length of  
604 the 5'UTR, CDS and 3'UTR and the GC content of both 5' and 3' UTR. The software also calculates  
605 the folding free energy for the 5' and 3' UTR (by using the RNAfold algorithm of the Vienna package  
606 (57), normalized by the length (MFE per bp) that is a measure of the stability and the complexity of  
607 the RNA secondary structure, an “in-house” devised TOP-mRNA local score and the Codon  
608 Adaptation Index (CAI, (58)), based on the codon usage of human genes. All statistical analyses of  
609 the features distributions along different translation behaviours were conducted by the groups based  
610 statistics R package *ggstatsplot* (<https://cran.r-project.org/web/packages/ggstatsplot/index.html>) using  
611 the Kruskal-Wallis H-test for comparing independent samples.

#### 612 Enrichment analyses

613 We perform an array of different enrichment analyses as they are included in the clusterProfiler and  
614 DOSE R packages (23,59) including Gene Ontology annotation analysis (for all “biological processes”,  
615 “molecular functions” and “cellular component” categories), gene set enrichment analysis GSEA,  
616 KEGG pathway analysis (60) and Reactome pathway analysis (61). We visualise the results of the  
617 most significant enrichment on categories, gene sets and pathways by using typical bar/dot-plots of  
618 enrichment and a powerful graphical output of the above R package, the Gene-concept network plot  
619 (cneplot from clusterProfiler).

#### 620 Translation ratio, translation efficiency

621 We define and calculate for translation ratio by using the measure of stable state mRNA from RNA-  
622 seq and a measure for mono/polysome fraction occupancy from polysome profile. We first computed  
623 the average of all the 6 polysome profile conditions (mono-, light- heavy- in high and low glucose) and  
624 the average of the two RNA-seq conditions (high and low glucose) and then we simply divide each  
625 polysome profile condition average with the respective RNA-seq average. This calculation resulted in  
626 6 measurements of translation ratio for all genes in the three polysome fractions (monosomes, light  
627 and heavy polysomes) and the two glucose treatments (high and low). Then we computed what we  
628 call the translation efficiency of each gene in both glucose treatments (high and low) by subtracting  
629 the average of translation ratio in light plus heavy polysomes in high glucose from the same average  
630 in low glucose. These calculations allowed us to distinguish the most translated genes and those  
631 ones with the biggest shift in translation between high and low glucose. We have classified  
632 differences in translation ratios between high and low glucose to 3 groups according to the log fold-

633 change (FC). First at +0.5 LogFC as highly translated in glucose, second with -0.25 logFC as lowly  
634 translated and a control group with +/-0.01 LogFC as control. We choose these thresholds in such a  
635 way as to generate 3 groups almost equal (UP, DOWN and control) sizes so that the comparative  
636 statistics will be more robust.

637

## 638 **ACKNOWLEDGEMENTS**

639 We thank the staff of Genom'ic platform (Cochin Institute, Paris) for library preparations and  
640 sequencing, and Julia Morales (Station Biologique de Roscoff) for helpful discussions and for  
641 providing antibody samples.

642

## 643 **DATA AVAILABILITY**

644 Raw sequencing data files and processes count tables for all transcripts/genes are available on  
645 Zenodo : DOI 10.5281/zenodo.4279599. The RNA features extraction tool, our inhouse software for  
646 the retrieval and calculation of an array of sequence features for a given set of genes is freely  
647 accessible in the GitHub repository: [https://github.com/parisepigenetics/rna\\_feat\\_ext](https://github.com/parisepigenetics/rna_feat_ext). The R-code for  
648 all the analyses in this work is available here:  
649 [https://github.com/parisepigenetics/Translatome\\_Bcells\\_glucose](https://github.com/parisepigenetics/Translatome_Bcells_glucose).

650

## 651 **SUPPORTING INFORMATION FILES**

652 Supplementary Data are available at Plos Genetics online.

653 Supplementary\_tables\_Bulfony.xls

654

## 655 **FUNDING DISCLOSURE**

656 This work was supported by the Université Sorbonne Paris Cité (USPC) 2014 [appel à projets de  
657 recherche, 2014].

658 Funding for open access charge: [ANR-17-CE12-0010-01]

659

## 660 **CONFLICT OF INTEREST**

661 Not declared

662

## 663 REFERENCES

- 664 1. Hohmeier HE, Newgard CB. Cell lines derived from pancreatic islets. *Molecular and Cellular*  
665 *Endocrinology*. déc 2004;228(1-2):121-8.
- 666 2. Scharfmann R, Rachdi L, Ravassard P. Concise review: in search of unlimited sources of  
667 functional human pancreatic beta cells. *Stem Cells Transl Med*. janv 2013;2(1):61-7.
- 668 3. Movahedi B, Gysemans C, Jacobs-Tulleneers-Thevissen D, Mathieu C, Pipeleers D. Pancreatic  
669 Duct Cells in Human Islet Cell Preparations Are a Source of Angiogenic Cytokines Interleukin-8  
670 and Vascular Endothelial Growth Factor. *Diabetes*. 1 août 2008;57(8):2128-36.
- 671 4. Schmidt SF, Madsen JGS, Frafjord KØ, Poulsen L la C, Salö S, Boergesen M, et al. Integrative  
672 Genomics Outlines a Biphasic Glucose Response and a ChREBP-ROR $\gamma$  Axis Regulating  
673 Proliferation in  $\beta$  Cells. *Cell Reports*. août 2016;16(9):2359-72.
- 674 5. Ravassard P, Hazhouz Y, Pechberty S, Bricout-Neveu E, Armanet M, Czernichow P, et al. A  
675 genetically engineered human pancreatic beta cell line exhibiting glucose-inducible insulin  
676 secretion. *J Clin Invest*. sept 2011;121(9):3589-97.
- 677 6. Richards P, Rachdi L, Oshima M, Marchetti P, Bugliani M, Armanet M, et al. MondoA Is an  
678 Essential Glucose-Responsive Transcription Factor in Human Pancreatic  $\beta$ -Cells. *Diabetes*. mars  
679 2018;67(3):461-72.
- 680 7. Shalev A, Pise-Masison CA, Radonovich M, Hoffmann SC, Hirshberg B, Brady JN, et al.  
681 Oligonucleotide Microarray Analysis of Intact Human Pancreatic Islets: Identification of  
682 Glucose-Responsive Genes and a Highly Regulated TGF $\beta$  Signaling Pathway. *Endocrinology*.  
683 sept 2002;143(9):3695-3695.
- 684 8. Itoh N, Sei T, Nose K, Okamoto H. Glucose stimulation of the proinsulin synthesis in isolated  
685 pancreatic islets without increasing amount of proinsulin mRNA. *FEBS Letters*. 15 sept  
686 1978;93(2):343-7.
- 687 9. Welsh M, Scherberg N, Gilmore R, Steiner DF. Translational control of insulin biosynthesis.  
688 Evidence for regulation of elongation, initiation and signal-recognition-particle-mediated  
689 translational arrest by glucose. *Biochemical Journal*. 15 avr 1986;235(2):459-67.
- 690 10. Permutt MA. Effect of glucose on initiation and elongation rates in isolated rat pancreatic islets.  
691 *J Biol Chem*. 10 mai 1974;249(9):2738-42.
- 692 11. Greenman IC, Gomez E, Moore CEJ, Herbert TP. Distinct glucose-dependent stress responses  
693 revealed by translational profiling in pancreatic -cells. *Journal of Endocrinology*. 1 janv  
694 2007;192(1):179-87.
- 695 12. Scharfmann R, Pechberty S, Hazhouz Y, von Bulow M, Bricout-Neveu E, Grenier-Godard M, et al.  
696 Development of a conditionally immortalized human pancreatic beta cell line. *J Clin Invest*. mai  
697 2014;124(5):2087-98.



- 698 13. Gandin V, Sikström K, Alain T, Morita M, McLaughlan S, Larsson O, et al. Polysome fractionation  
699 and analysis of mammalian translomes on a genome-wide scale. *J Vis Exp*. 17 mai 2014;(87).
- 700 14. Floor SN, Doudna JA. Tunable protein synthesis by transcript isoforms in human cells. *eLife*  
701 [Internet]. 6 janv 2016 [cité 28 août 2018];5. Disponible sur:  
702 <https://elifesciences.org/articles/10921>
- 703 15. Ritchie ME, Phipson B, Wu D, Hu Y, Law CW, Shi W, et al. limma powers differential expression  
704 analyses for RNA-sequencing and microarray studies. *Nucleic Acids Research*. 20 avr  
705 2015;43(7):e47-e47.
- 706 16. Ort T, Voronov S, Guo J, Zawalich K, Froehner SC, Zawalich W, et al. Dephosphorylation of  
707 beta2-syntrophin and Ca<sup>2+</sup>/mu-calpain-mediated cleavage of ICA512 upon stimulation of  
708 insulin secretion. *EMBO J*. 1 août 2001;20(15):4013-23.
- 709 17. Guest PC, Rhodes CJ, Hutton JC. Regulation of the biosynthesis of insulin-secretory-granule  
710 proteins. Co-ordinate translational control is exerted on some, but not all, granule matrix  
711 constituents. *Biochem J*. 15 janv 1989;257(2):431-7.
- 712 18. Alarcón C, Lincoln B, Rhodes CJ. The biosynthesis of the subtilisin-related proprotein  
713 convertase PC3, but not that of the PC2 convertase, is regulated by glucose in parallel to  
714 proinsulin biosynthesis in rat pancreatic islets. *J Biol Chem*. 25 févr 1993;268(6):4276-80.
- 715 19. Scrucca L, Fop M, Murphy TB, Raftery AE. mclust 5: Clustering, Classification and Density  
716 Estimation Using Gaussian Finite Mixture Models. *R J*. août 2016;8(1):289-317.
- 717 20. Kinsella RJ, Kähäri A, Haider S, Zamora J, Proctor G, Spudich G, et al. Ensembl BioMart: a hub  
718 for data retrieval across taxonomic space. *Database (Oxford)*. 2011;2011:bar030.
- 719 21. Pesole G, Liuni S, Grillo G, Ippedico M, Larizza A, Makalowski W, et al. UTRdb: a specialized  
720 database of 5' and 3' untranslated regions of eukaryotic mRNAs. *Nucleic Acids Res*.  
721 1999;27(1):188-91.
- 722 22. Meyuhas O, Kahan T. The race to decipher the top secrets of TOP mRNAs. *Biochimica et*  
723 *Biophysica Acta (BBA) - Gene Regulatory Mechanisms*. juill 2015;1849(7):801-11.
- 724 23. Yu G, Wang L-G, Han Y, He Q-Y. clusterProfiler: an R Package for Comparing Biological Themes  
725 Among Gene Clusters. *OMICS: A Journal of Integrative Biology*. mai 2012;16(5):284-7.
- 726 24. Thoreen CC, Chantranupong L, Keys HR, Wang T, Gray NS, Sabatini DM. A unifying model for  
727 mTORC1-mediated regulation of mRNA translation. *Nature*. 3 mai 2012;485(7396):109-13.
- 728 25. Markou T, Marshall AK, Cullingford TE, Tham EL, Sugden PH, Clerk A. Regulation of the  
729 cardiomyocyte transcriptome vs translome by endothelin-1 and insulin: translational  
730 regulation of 5' terminal oligopyrimidine tract (TOP) mRNAs by insulin. *BMC Genomics*.  
731 2010;11(1):343.
- 732 26. Zhang C-S, Hawley SA, Zong Y, Li M, Wang Z, Gray A, et al. Fructose-1,6-bisphosphate and  
733 aldolase mediate glucose sensing by AMPK. *Nature*. 19 juill 2017;548(7665):112-6.
- 734 27. Corradetti MN, Inoki K, Bardeesy N, DePinho RA, Guan K-L. Regulation of the TSC pathway by  
735 LKB1: evidence of a molecular link between tuberous sclerosis complex and Peutz-Jeghers  
736 syndrome. *Genes Dev*. 1 juill 2004;18(13):1533-8.

- 737 28. Gwinn DM, Shackelford DB, Egan DF, Mihaylova MM, Mery A, Vasquez DS, et al. AMPK  
738 Phosphorylation of Raptor Mediates a Metabolic Checkpoint. *Molecular Cell*. avr  
739 2008;30(2):214-26.
- 740 29. Gosselin P, Oulhen N, Jam M, Ronzca J, Cormier P, Czjzek M, et al. The translational repressor  
741 4E-BP called to order by eIF4E: new structural insights by SAXS. *Nucleic acids research*. avr  
742 2011;39(8):3496-503.
- 743 30. Zakaria A, Berthault C, Cosson B, Jung V, Guerrero IC, Rachdi L, et al. Glucose treatment of  
744 human pancreatic  $\beta$ -cells enhances translation of mRNAs involved in energetics and insulin  
745 secretion. *J Biol Chem*. 27 mai 2021;297(1):100839.
- 746 31. Harashima S -i., Clark A, Christie MR, Notkins AL. The dense core transmembrane vesicle  
747 protein IA-2 is a regulator of vesicle number and insulin secretion. *Proceedings of the National  
748 Academy of Sciences*. 14 juin 2005;102(24):8704-9.
- 749 32. Ahren B, Bertrand G, Roye M, Ribes G. Pancreastatin modulates glucose-stimulated insulin  
750 secretion from the perfused rat pancreas. *Acta Physiologica Scandinavica*. août  
751 1996;158(1):63-70.
- 752 33. Tang X, Muniappan L, Tang G, Ozcan S. Identification of glucose-regulated miRNAs from  
753 pancreatic  $\beta$  cells reveals a role for miR-30d in insulin transcription. *RNA*. févr  
754 2009;15(2):287-93.
- 755 34. Harding HP, Zhang Y, Zeng H, Novoa I, Lu PD, Calton M, et al. An integrated stress response  
756 regulates amino acid metabolism and resistance to oxidative stress. *Mol Cell*. mars  
757 2003;11(3):619-33.
- 758 35. Watatani Y, Ichikawa K, Nakanishi N, Fujimoto M, Takeda H, Kimura N, et al. Stress-induced  
759 Translation of ATF5 mRNA Is Regulated by the 5'-Untranslated Region. *Journal of Biological  
760 Chemistry*. 1 févr 2008;283(5):2543-53.
- 761 36. Palam LR, Baird TD, Wek RC. Phosphorylation of eIF2 Facilitates Ribosomal Bypass of an  
762 Inhibitory Upstream ORF to Enhance CHOP Translation. *J Biol Chem*. 1 avr  
763 2011;286(13):10939-49.
- 764 37. Andreev DE, O'Connor PB, Zhdanov AV, Dmitriev RI, Shatsky IN, Papkovsky DB, et al. Oxygen  
765 and glucose deprivation induces widespread alterations in mRNA translation within 20 minutes.  
766 *Genome Biology* [Internet]. déc 2015 [cité 20 sept 2018];16(1). Disponible sur:  
767 <http://genomebiology.com/2015/16/1/90>
- 768 38. Lindqvist LM, Tandoc K, Topisirovic I, Furic L. Cross-talk between protein synthesis, energy  
769 metabolism and autophagy in cancer. *Current Opinion in Genetics & Development*. févr  
770 2018;48:104-11.
- 771 39. Juliana CA, Yang J, Roza AV, Good A, Groff DN, Wang S-Z, et al. ATF5 regulates  $\beta$ -cell survival  
772 during stress. *Proceedings of the National Academy of Sciences*. 7 févr 2017;114(6):1341-6.
- 773 40. Juliana CA, Yang J, Cannon CE, Good AL, Haemmerle MW, Stoffers DA. A PDX1-ATF  
774 transcriptional complex governs  $\beta$  cell survival during stress. *Molecular Metabolism* [Internet].  
775 août 2018 [cité 15 oct 2018]; Disponible sur:  
776 <https://linkinghub.elsevier.com/retrieve/pii/S2212877818305179>

- 777 41. Kilberg MS, Shan J, Su N. ATF4-dependent transcription mediates signaling of amino acid  
778 limitation. *Trends Endocrinol Metab.* nov 2009;20(9):436-43.
- 779 42. Ryazanov AG, Spirin AS. Phosphorylation of elongation factor 2: a key mechanism regulating  
780 gene expression in vertebrates. *New Biol.* oct 1990;2(10):843-50.
- 781 43. Gao W, Li Q, Zhu R, Jin J. La Autoantigen Induces Ribosome Binding Protein 1 (RRBP1)  
782 Expression through Internal Ribosome Entry Site (IRES)-Mediated Translation during Cellular  
783 Stress Condition. *International Journal of Molecular Sciences.* 20 juill 2016;17(7):1174.
- 784 44. Cui XA, Zhang H, Palazzo AF. p180 promotes the ribosome-independent localization of a subset  
785 of mRNA to the endoplasmic reticulum. *PLoS Biol.* 2012;10(5):e1001336.
- 786 45. Shibata Y, Shemesh T, Prinz WA, Palazzo AF, Kozlov MM, Rapoport TA. Mechanisms  
787 determining the morphology of the peripheral ER. *Cell.* 24 nov 2010;143(5):774-88.
- 788 46. Harding HP, Zhang Y, Ron D. Protein translation and folding are coupled by an endoplasmic-  
789 reticulum-resident kinase. *Nature.* 21 janv 1999;397(6716):271-4.
- 790 47. Scheuner D, Mierde DV, Song B, Flamez D, Creemers JWM, Tsukamoto K, et al. Control of  
791 mRNA translation preserves endoplasmic reticulum function in beta cells and maintains  
792 glucose homeostasis. *Nat Med.* juill 2005;11(7):757-64.
- 793 48. Buttgerit F, Brand MD. A hierarchy of ATP-consuming processes in mammalian cells. *Biochem*  
794 *J.* 15 nov 1995;312 ( Pt 1):163-7.
- 795 49. Laplante M, Sabatini DM. mTOR Signaling in Growth Control and Disease. *Cell.* avr  
796 2012;149(2):274-93.
- 797 50. Gomez E, Powell ML, Greenman IC, Herbert TP. Glucose-stimulated Protein Synthesis in  
798 Pancreatic  $\beta$ -Cells Parallels an Increase in the Availability of the Translational Ternary Complex  
799 (eIF2-GTP-Met-tRNAi) and the Dephosphorylation of eIF2 $\alpha$ . *Journal of Biological Chemistry.* 24  
800 d c 2004;279(52):53937-46.
- 801 51. Lin S, Lin Y, Nery JR, Urich MA, Breschi A, Davis CA, et al. Comparison of the transcriptional  
802 landscapes between human and mouse tissues. *Proc Natl Acad Sci U S A.* 2 d c  
803 2014;111(48):17224-9.
- 804 52. Gosselin P, Martineau Y, Morales J, Czjzek M, Glippa V, Gauffeny I, et al. Tracking a refined  
805 eIF4E-binding motif reveals Angel1 as a new partner of eIF4E. *Nucleic Acids Res.* sept  
806 2013;41(16):7783-92.
- 807 53. Ewels P, Magnusson M, Lundin S, K ller M. MultiQC: summarize analysis results for multiple  
808 tools and samples in a single report. *Bioinformatics.* 1 oct 2016;32(19):3047-8.
- 809 54. Dobin A, Davis CA, Schlesinger F, Drenkow J, Zaleski C, Jha S, et al. STAR: ultrafast universal  
810 RNA-seq aligner. *Bioinformatics.* janv 2013;29(1):15-21.
- 811 55. Li B, Dewey CN. RSEM: accurate transcript quantification from RNA-Seq data with or without a  
812 reference genome. *BMC Bioinformatics.* 2011;12(1):323.
- 813 56. Wagner GP, Kin K, Lynch VJ. Measurement of mRNA abundance using RNA-seq data: RPKM  
814 measure is inconsistent among samples. *Theory in Biosciences.* d c 2012;131(4):281-5.

- 815 57. Lorenz R, Bernhart SH, Höner zu Siederdisen C, Tafer H, Flamm C, Stadler PF, et al. ViennaRNA  
816 Package 2.0. Algorithms for Molecular Biology. 2011;6(1):26.
- 817 58. Sharp PM, Li WH. The codon Adaptation Index--a measure of directional synonymous codon  
818 usage bias, and its potential applications. Nucleic Acids Res. 11 févr 1987;15(3):1281-95.
- 819 59. Yu G, Wang L-G, Yan G-R, He Q-Y. DOSE: an R/Bioconductor package for disease ontology  
820 semantic and enrichment analysis. Bioinformatics. 15 févr 2015;31(4):608-9.
- 821 60. Kanehisa M, Sato Y, Kawashima M, Furumichi M, Tanabe M. KEGG as a reference resource for  
822 gene and protein annotation. Nucleic Acids Res. 4 janv 2016;44(D1):D457-62.
- 823 61. Fabregat A, Korninger F, Viteri G, Sidiropoulos K, Marin-Garcia P, Ping P, et al. Reactome graph  
824 database: Efficient access to complex pathway data. PLoS Comput Biol. 2018;14(1):e1005968.

825

## 826 TABLE AND FIGURES LEGENDS

827

### 828 **Figure 1. Glucose induces increase in protein synthesis without affecting mRNA abundance** 829 **and regulates translation rates of a subset of mRNAs.**

830 **A.** Polysome profiles of EndoC- $\beta$ H2 with Low glucose (blue) and High glucose (red). The absorbance  
831 at 254 nm (A254) recorded during the collection of the fractions of the gradient is displayed. The  
832 positions of 40S, 60S, 80S and polysomes are indicated. The tree-colored bars represent the  
833 fractions that were pooled for sequencing: monosomes (green), light polysomes (yellow), heavy  
834 polysomes (light orange). EndoC- $\beta$ H2 cells in high glucose had a significantly higher  
835 polysome/monosome ratio than did EndoC- $\beta$ H2 cells in low glucose. Cells were treated in parallel  
836 using paired culture plates, and centrifugated together in the same rotor. Figure shows a  
837 representative replicate. The statistical significance of the polysome/monosome ratio was assessed  
838 using a paired t-test from three independent experiments (\*,  $p < 0.001$ ,  $n = 3$ ). **B.** MA-plot of total  
839 mRNA abundance, dots in green specify up-regulation. **C-E.** MA-plots for each pool of fractions:  
840 heavy polysomes (C), light polysomes (D) and monosomes (E); dots in green corresponds to  
841 transcripts that are upregulated upon glucose stimulation, dots in red to transcripts that are  
842 downregulated. **F.** Venn diagram showing the overlap between glucose UP- or DOWN- regulated  
843 transcripts in Light and Heavy polysomes. Total\_UP are transcripts varying in abundance. **G.** TPM  
844 values for each condition and each replicate are plotted. In red High glucose replicates, while in cyan  
845 Low glucose replicates. Names of the plotted gene is indicated above.

### 846 **Figure 2. Gene Ontology enrichment analysis, gene-concept plots (cneplots).**

847 Each cneplot illustrates the most significantly enriched Molecular Functions (MF, **A**) and Biological  
848 Processes (BP, **B**) categories. Lines of the same colour connect genes of the same GO category and  
849 the colour gradient of each gene corresponds to its log-FC.

### 850 **Figure 3. mRNA feature analysis of the 3 groups of differentially translated mRNAs. A.** Venn 851 diagram showing the overlap between the 200 mostly translated genes: best translated in high

852 glucose (grey circle), best translated in low glucose (blue circle), mRNAs with the most difference  
853 ones in ranking between low and high glucose (white circle). **B-F.** mRNA features analyses of 3  
854 groups of mRNAs based on the difference in translation ratio between high and low glucose. Higher  
855 (UP) or the lower (DOWN) translation ratio in high glucose, and a control group with no significant  
856 changes between high and low glucose. MFE/Bp is the folding free energy normalized by the length  
857 (see Material and Methods). **B**, coding length; **C**, 5'UTR length, **D**, 5'UTR MFE/Bp, **E**, 3'UTR length, **F**,  
858 3' UTR MFE/Bp.

859 **Figure 4. Clustering and mRNA features analysis.** **A.** Heatmap of the log<sub>2</sub> ratios between the  
860 average TPM of each differentially translated gene in high- over low- glucose. An unsupervised model  
861 clustering algorithm was used to cluster the differentially translated genes into six groups represented  
862 here with the coloured vertical bar at the left side of the figure. Colours range from dark red when  
863 genes are less represented in a polysome fraction to dark green when overrepresented in a polysome  
864 fraction in high glucose condition. The table summarizes the variations observed for the different  
865 features presented in **B-I** : Box plots of the different mRNA features of the six-identified cluster.

866 **Figure 5. Functional motifs analysis of the UTRs by interrogating the UTRdb for TOP motifs (A),**  
867 **and TOP, uORF and IRES in the 5'UTRs (B)**, common gene names of the encoding gene of each  
868 transcript are indicated on the right side. The darker the blue, the higher the number of features per  
869 RNA (from 1 to 3 per RNA).

870 **Figure 6. Cluster Gene Ontology enrichment.** **A-D.** barplot of gene ontology terms enriched for  
871 biological processes for clusters 1, 4, 5 and 6 using the R package clusterProfiler. **E.** Venn diagram  
872 of genes belong to cluster 1 (grey circle) and 6 (blue circle) with previously reported TOP-RNAs (white  
873 circle).

874 **Figure 7. Activation of mTOR and eIF2 $\alpha$  upon glucose induction.** Western blot analysis of cells  
875 incubated with 0.5- or 20-mM glucose for the indicated time. Where indicated, cells were pre-treated  
876 for one hour with cycloheximide (CHX) to block translation, or with rapamycin to inhibit mTOR  
877 activation (see text). For 4EBP1, upper bands ( $\beta$  and  $\gamma$ ) correspond to hyperphosphorylated forms.  
878 The ratio phosphorylated/total proteins was reported from quantification presented in Supp. Fig .6.

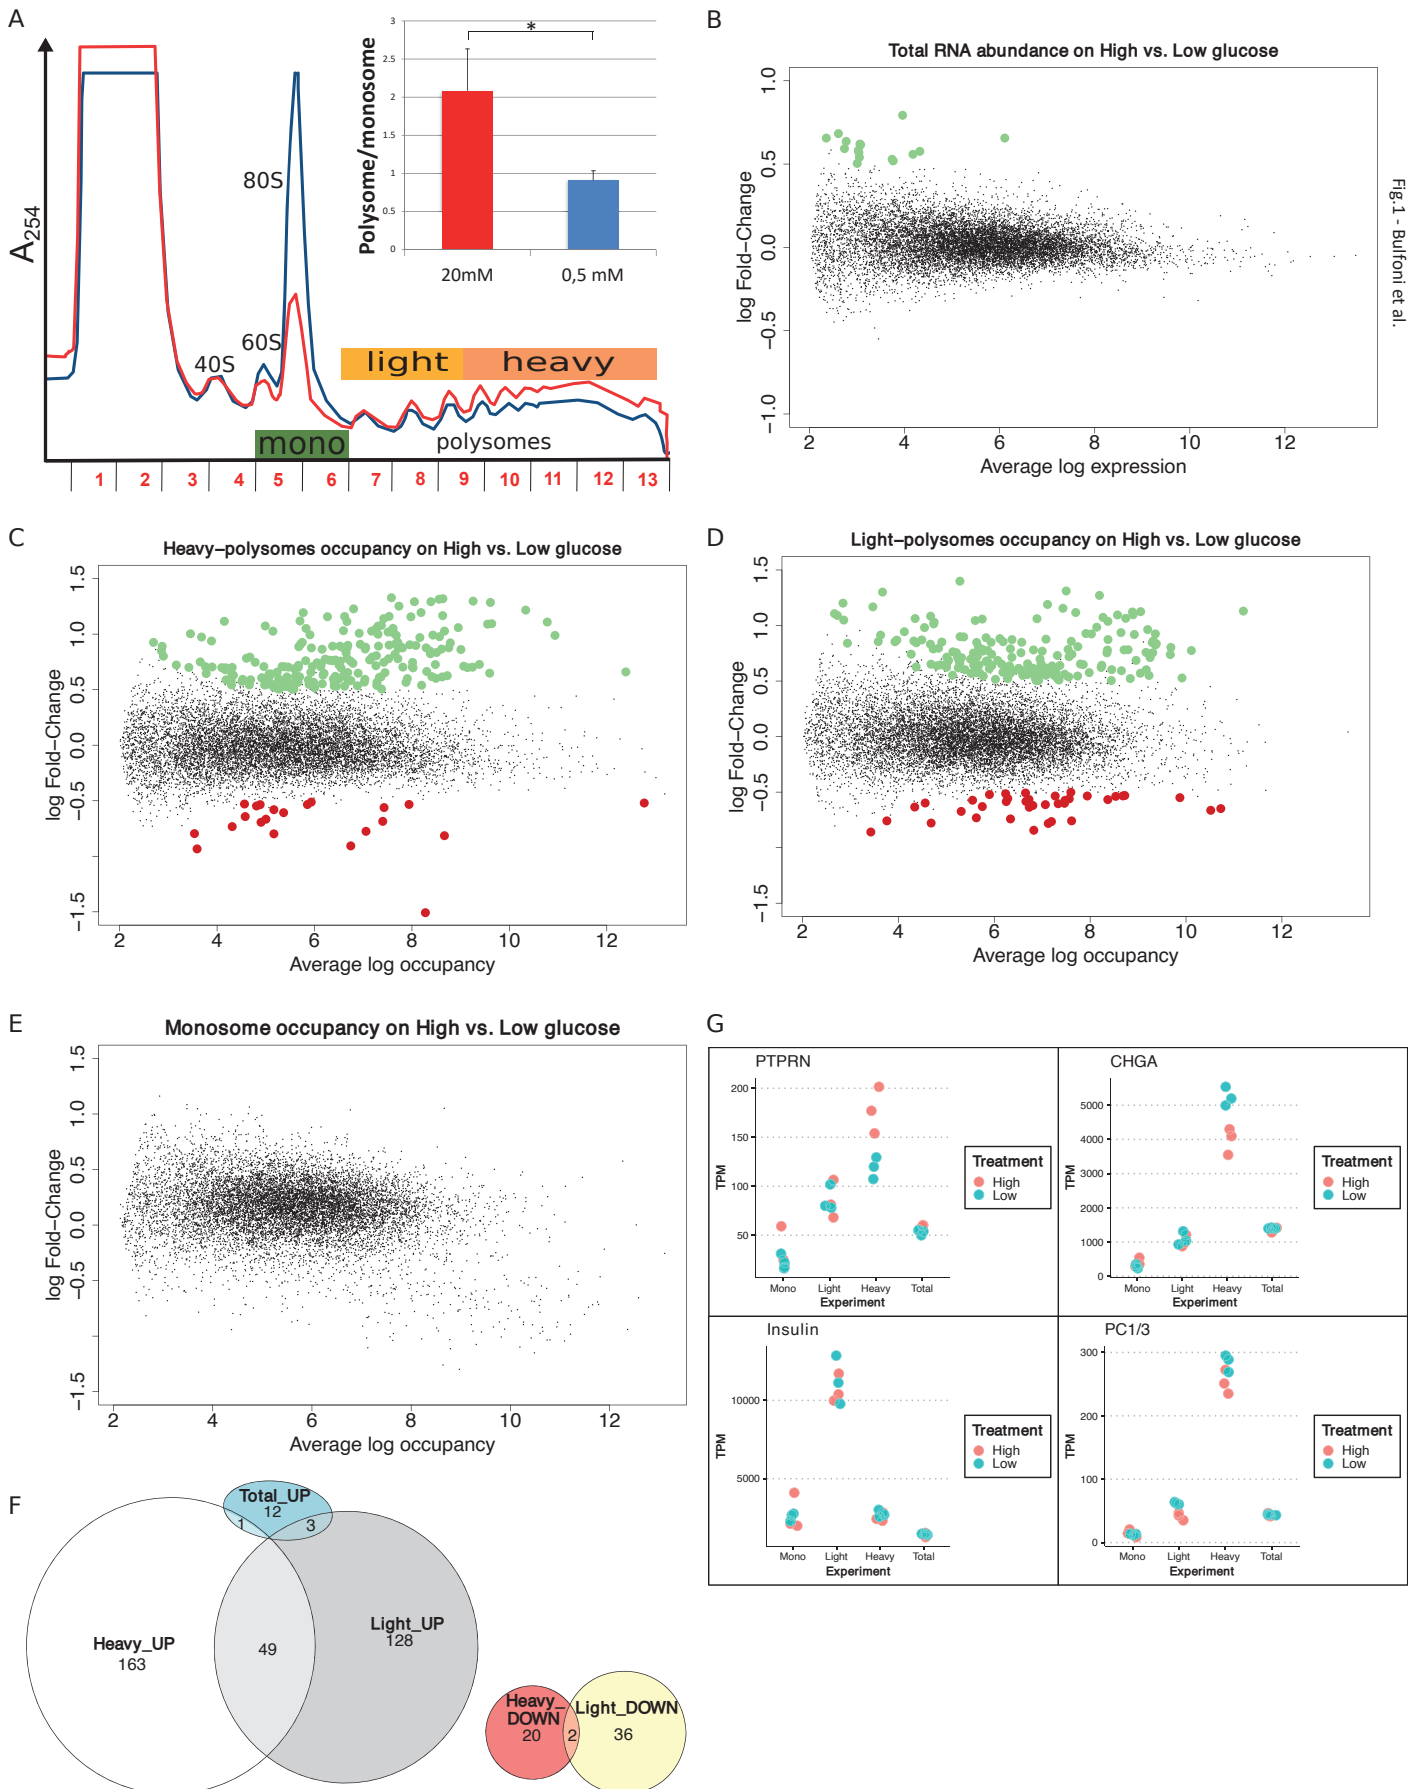

A

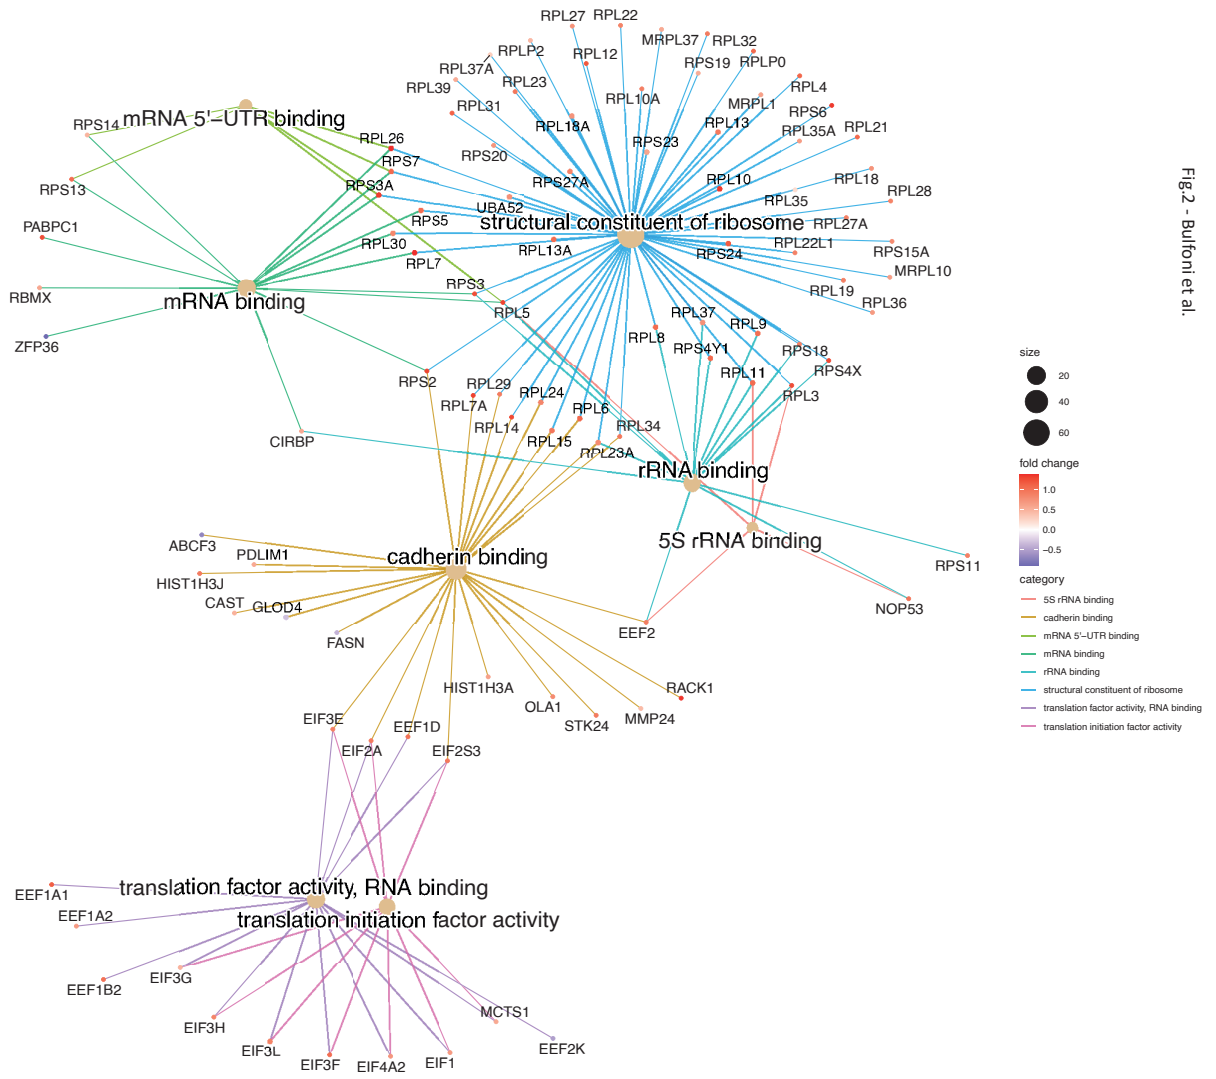

Fig. 2 - Bulfonetti et al.

B

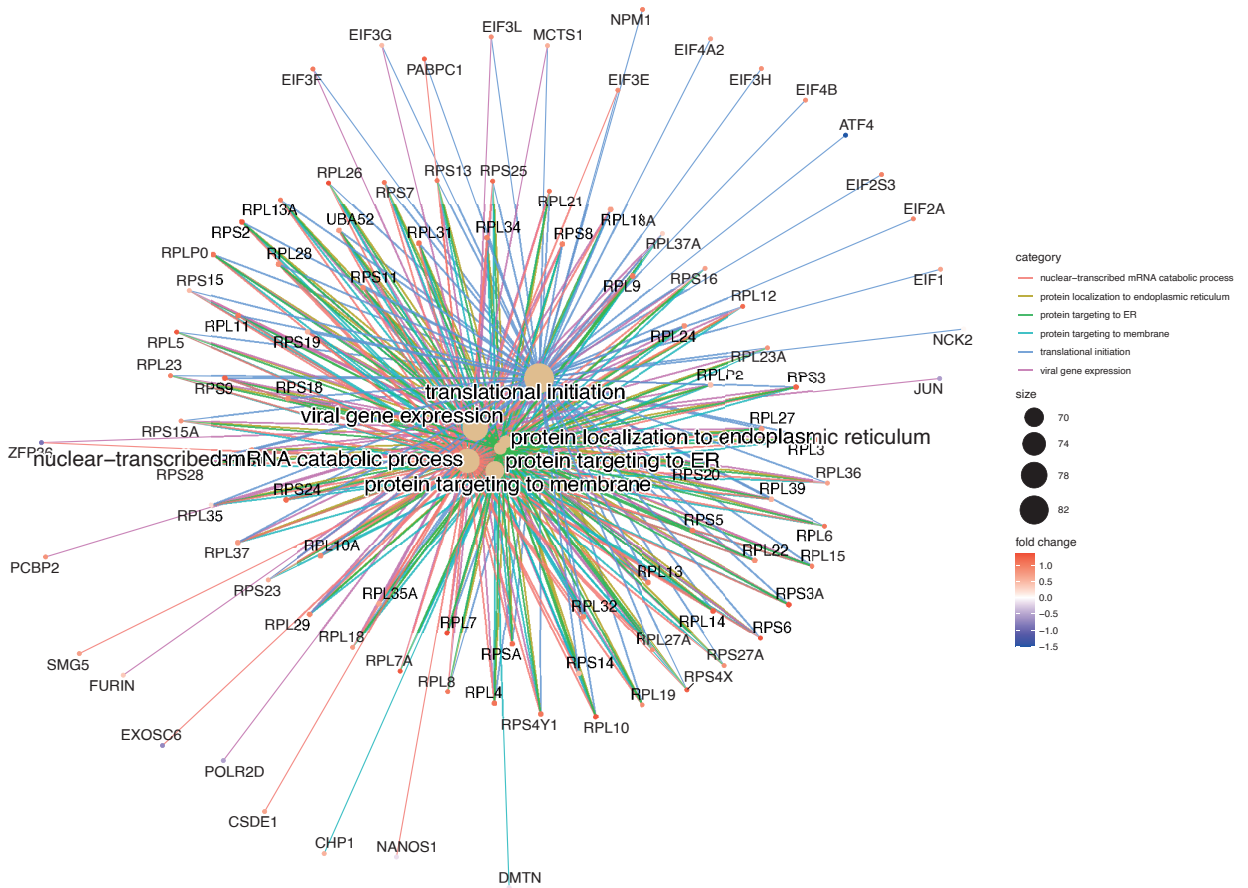

Fig.3 - Bulfoni et al.

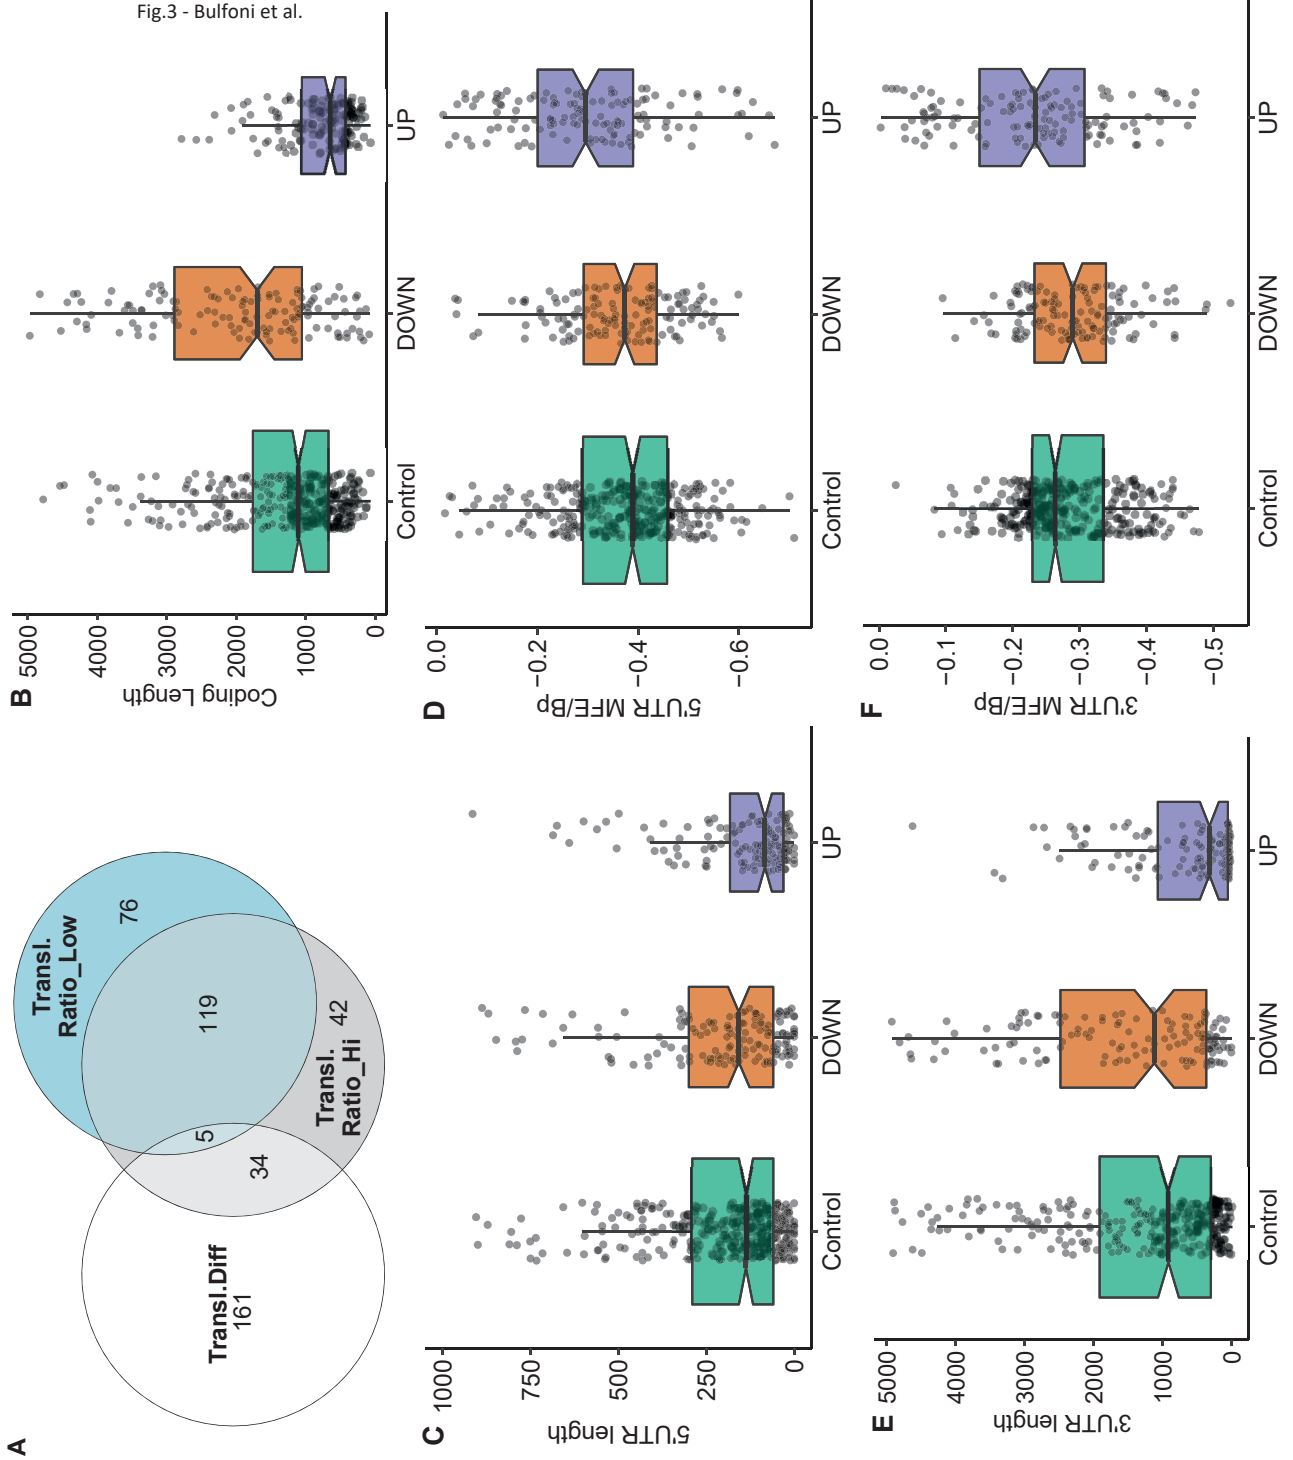



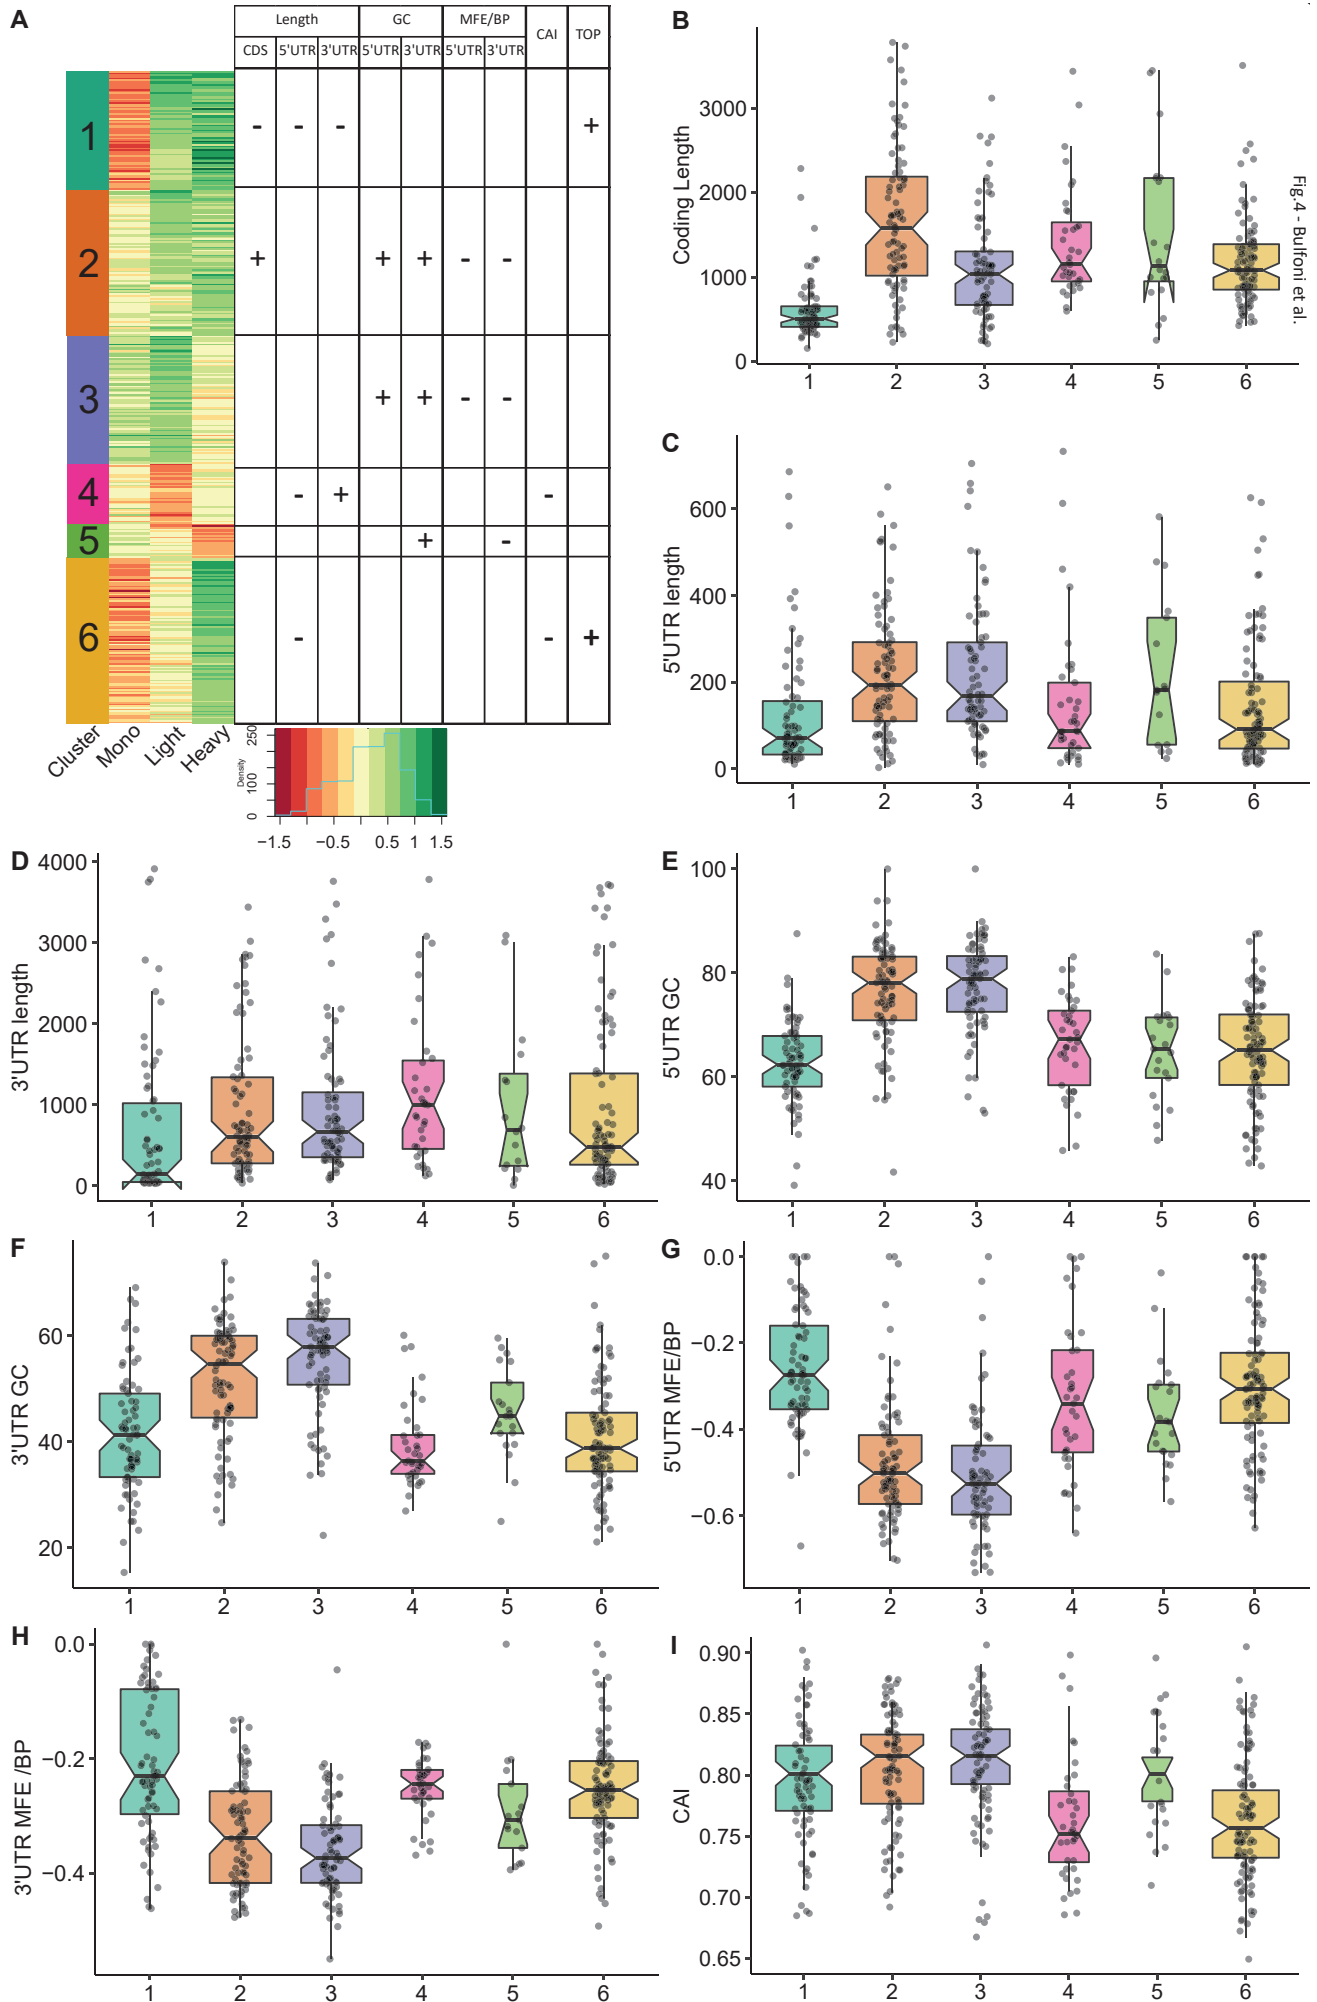

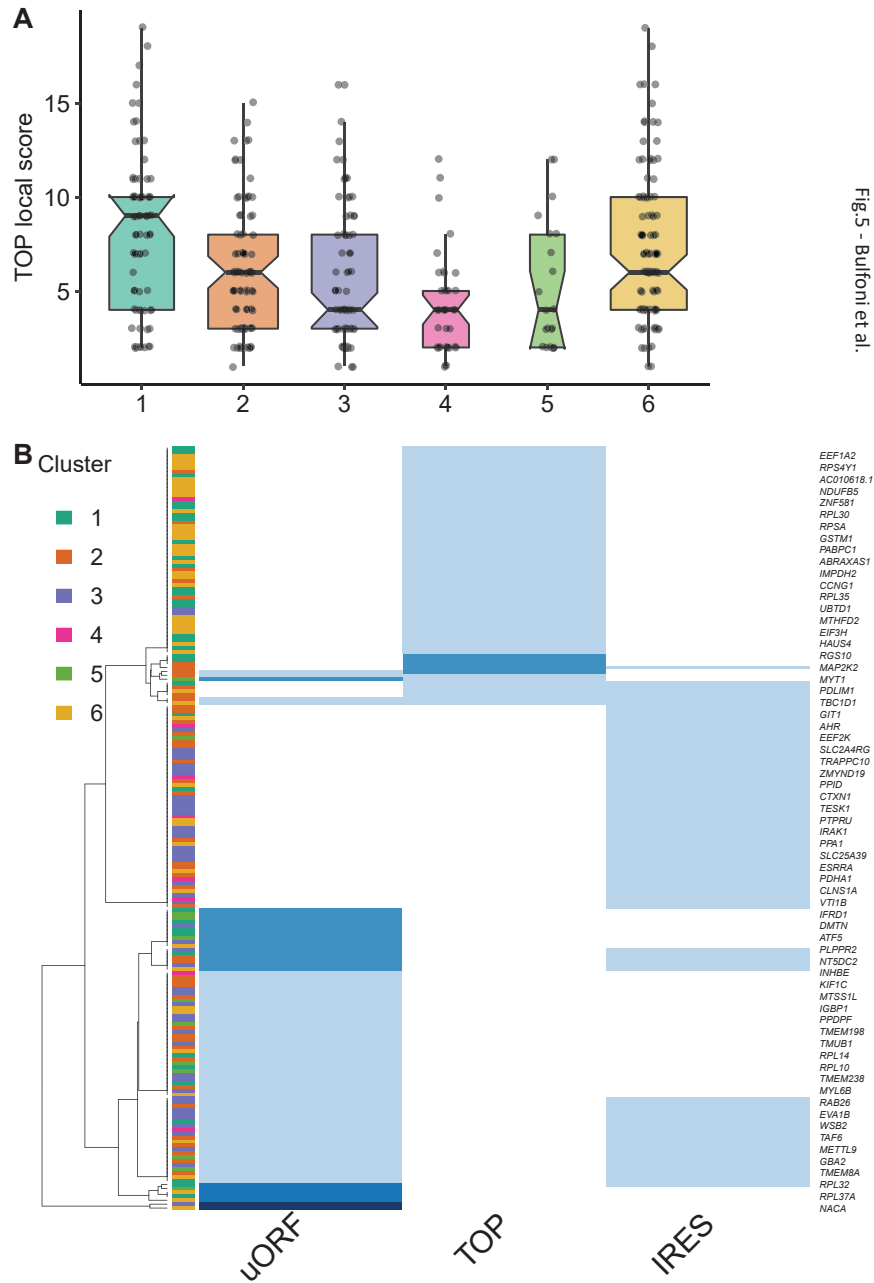

Fig. 5 - Bulfonti et al.

### A BP GO enrichment cluster 1

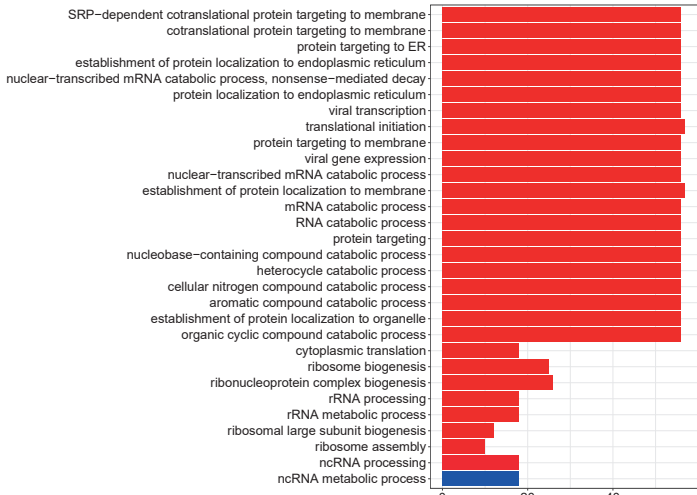

### B BP GO enrichment cluster 6

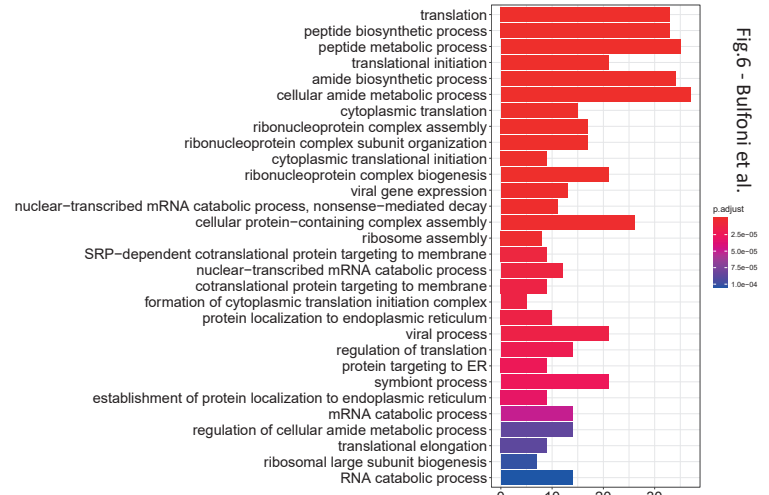

Fig.6 - Bufoni et al.

### C BP GO enrichment cluster 4

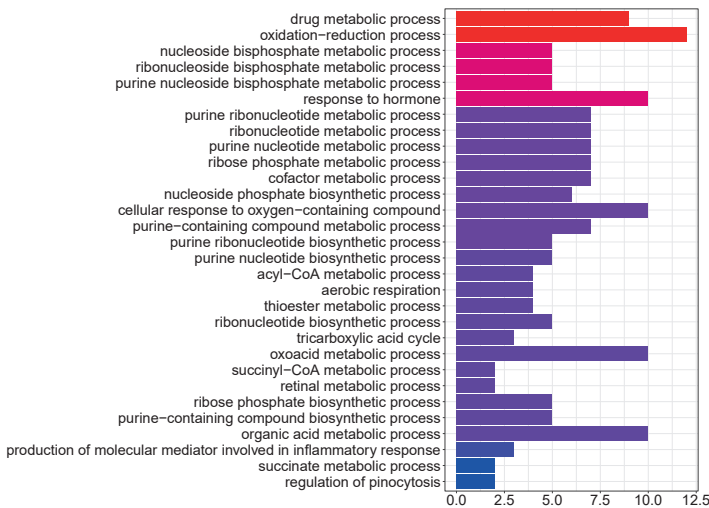

### D BP GO enrichment cluster 5

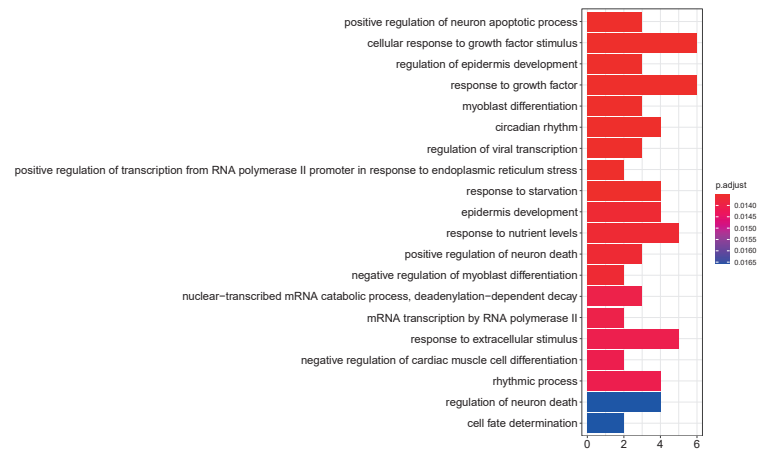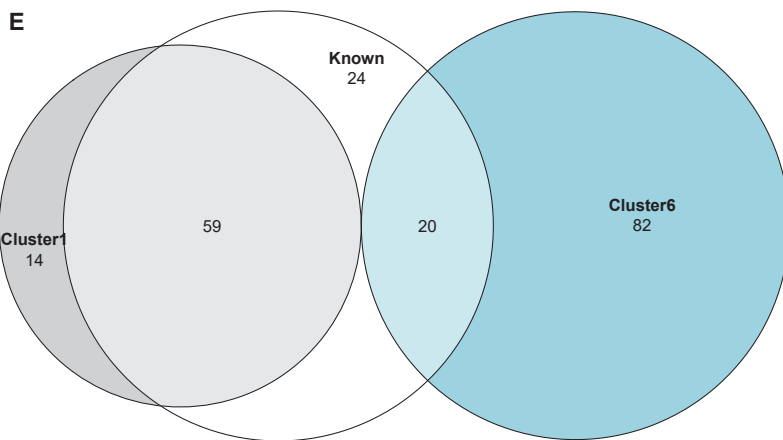

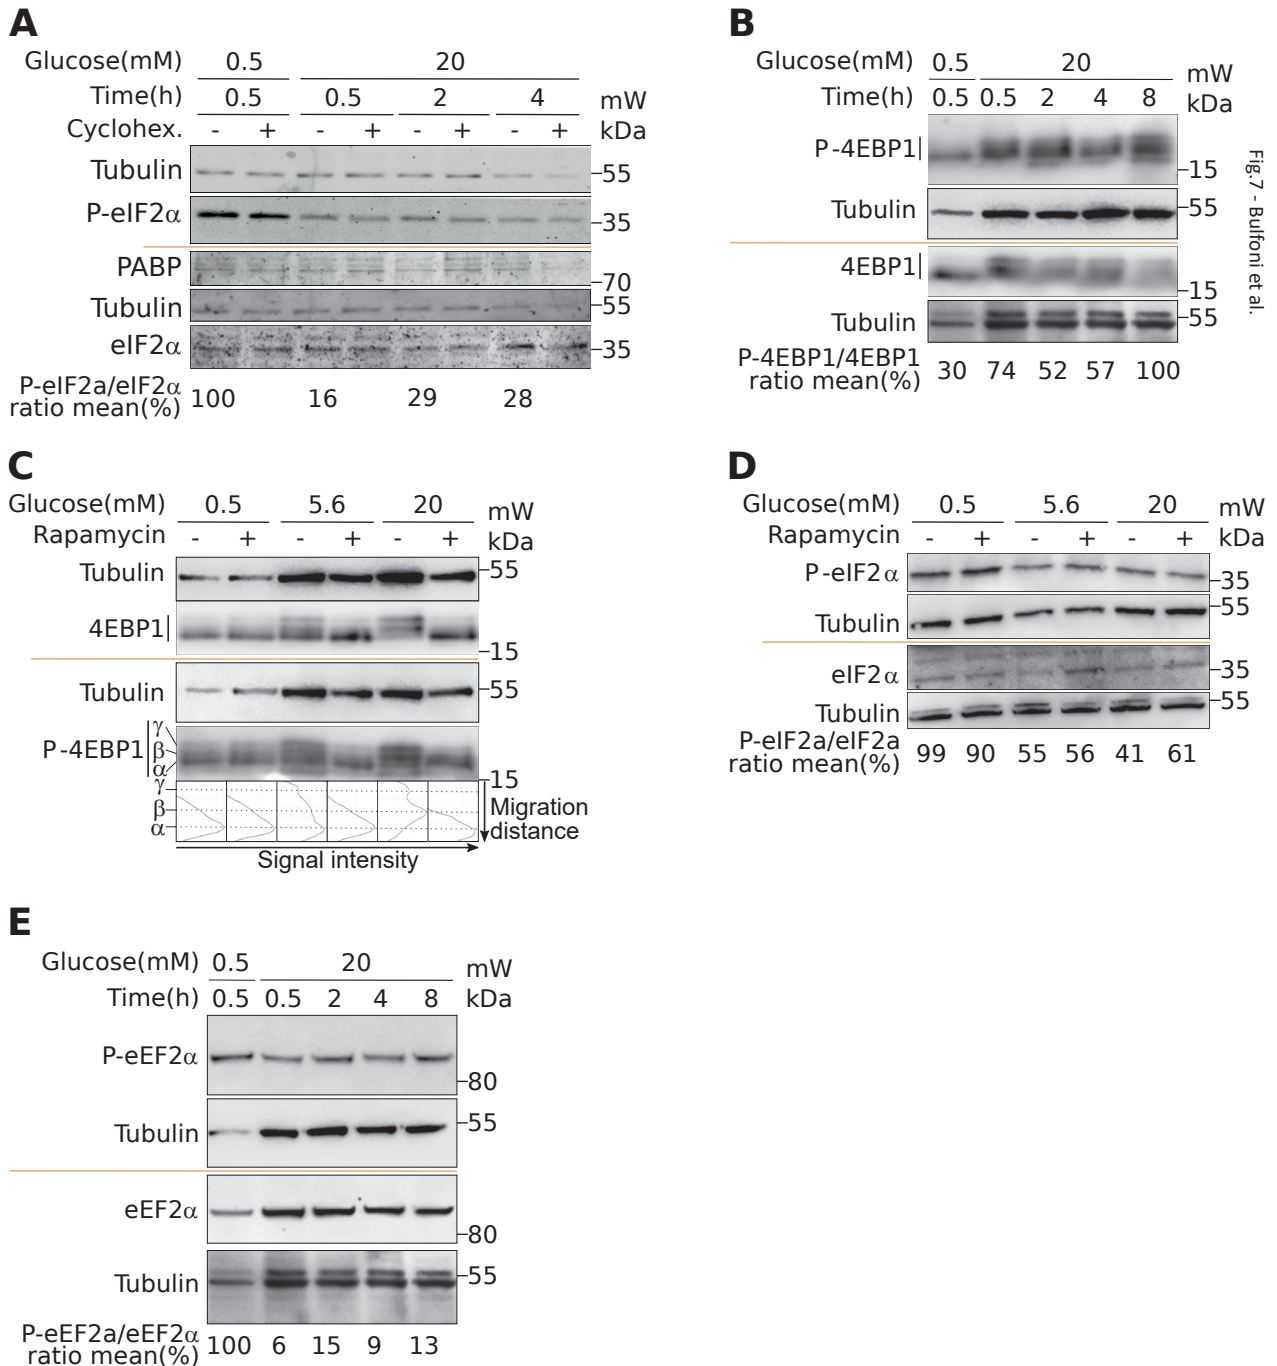

Fig. 7 - Bulfoni et al.

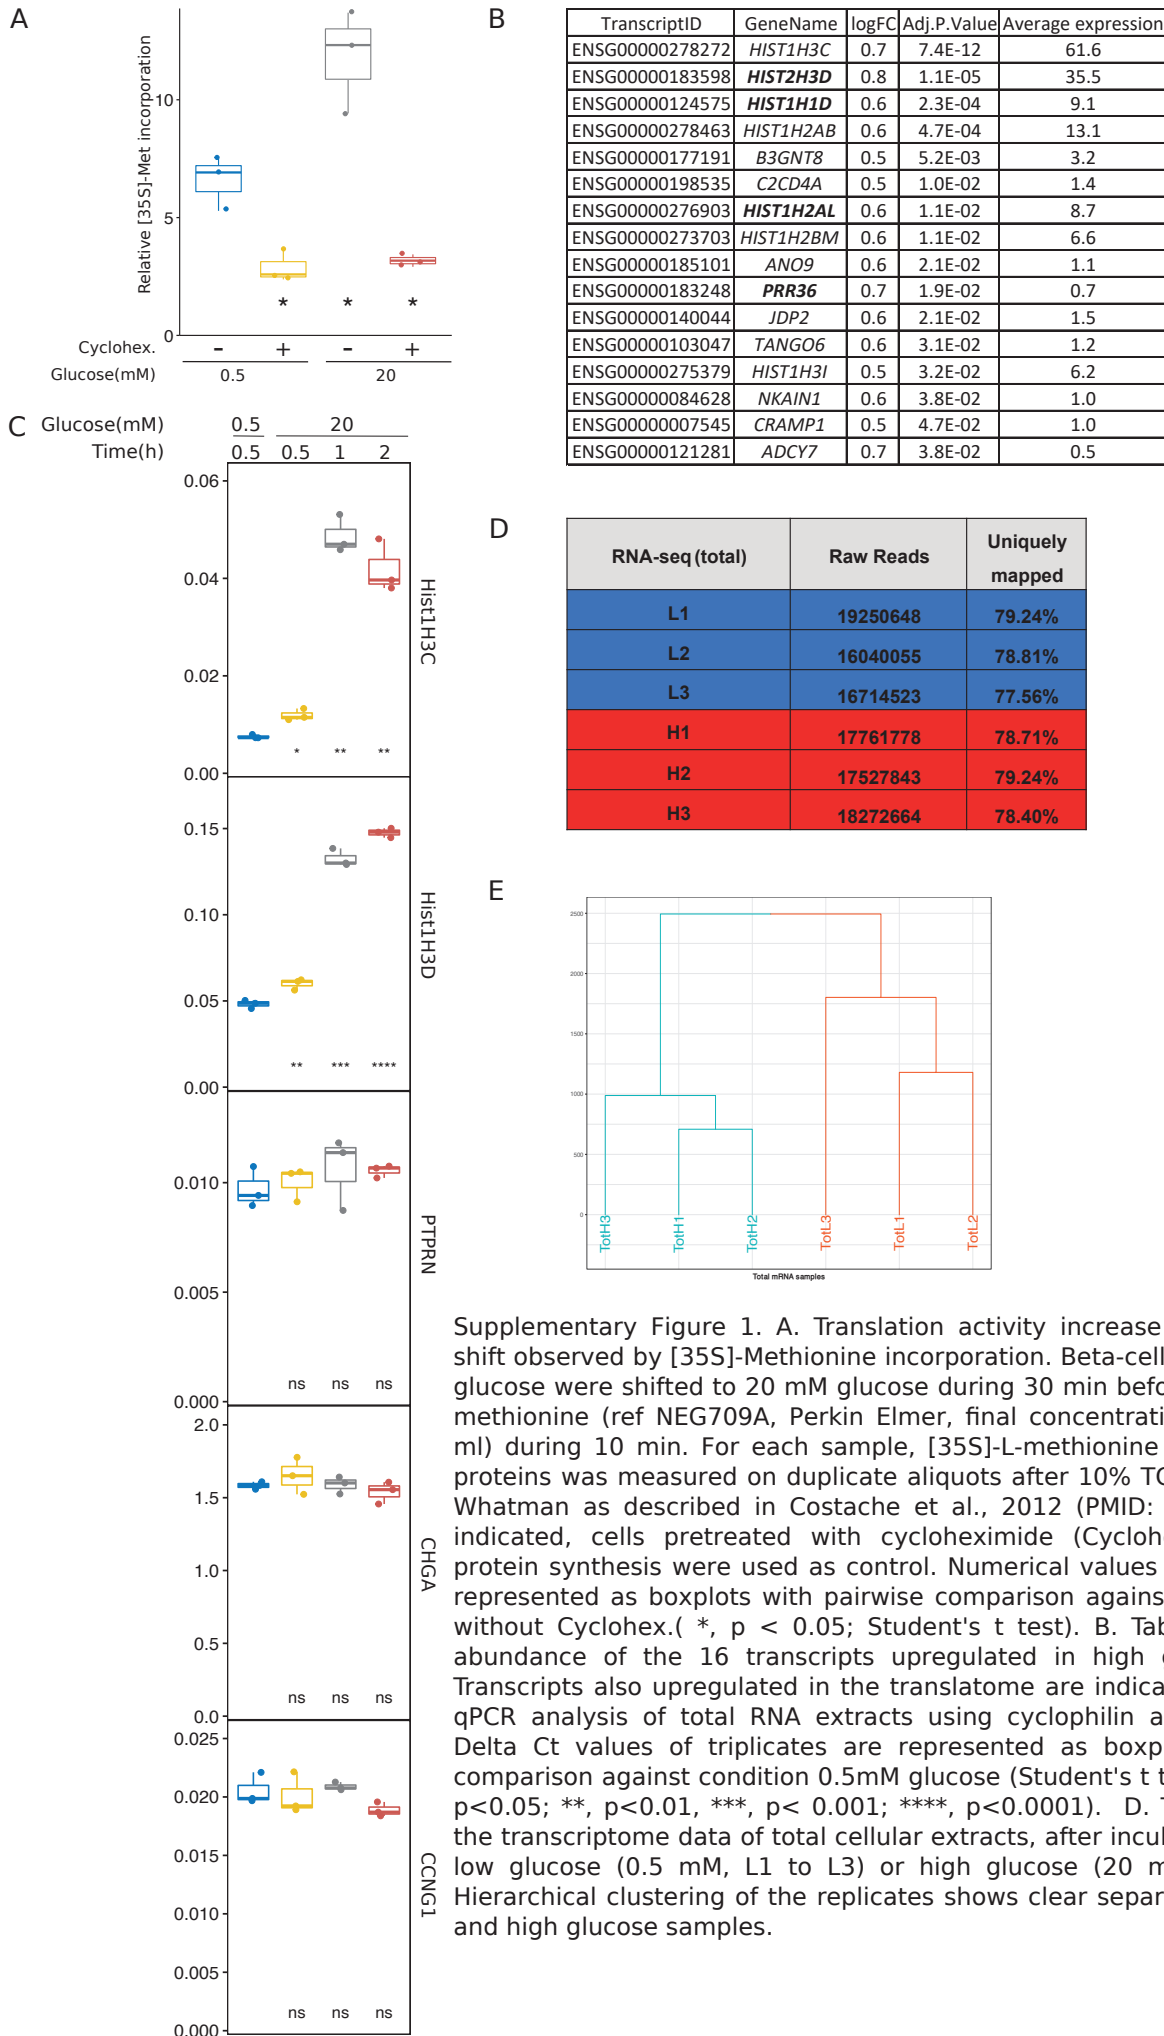

Supplementary Figure 1. A. Translation activity increase following glucose shift observed by [35S]-Methionine incorporation. Beta-cells grown in 0.5 mM glucose were shifted to 20 mM glucose during 30 min before adding [35S]-L-methionine (ref NEG709A, Perkin Elmer, final concentration 40 microCurie/ml) during 10 min. For each sample, [35S]-L-methionine incorporation into proteins was measured on duplicate aliquots after 10% TCA precipitation on Whatman as described in Costache et al., 2012 (PMID: 22425618). When indicated, cells pretreated with cycloheximide (Cyclohex.) that prevent protein synthesis were used as control. Numerical values of triplicates were represented as boxplots with pairwise comparison against condition 0.5mM without Cyclohex. (\*,  $p < 0.05$ ; Student's t test). B. Table presenting the abundance of the 16 transcripts upregulated in high glucose condition. Transcripts also upregulated in the translatoome are indicated in bold. C. RT-qPCR analysis of total RNA extracts using cyclophilin as reference gene. Delta Ct values of triplicates are represented as boxplots with pairwise comparison against condition 0.5mM glucose (Student's t test; ns,  $p > 0.05$ ; \*,  $p < 0.05$ ; \*\*,  $p < 0.01$ , \*\*\*,  $p < 0.001$ ; \*\*\*\*,  $p < 0.0001$ ). D. Table summarizing the transcriptome data of total cellular extracts, after incubation of cells with low glucose (0.5 mM, L1 to L3) or high glucose (20 mM, H1 to H3). E. Hierarchical clustering of the replicates shows clear separation between low and high glucose samples.

A

| Monosomes         | Raw_reads | Uniquely mapped |
|-------------------|-----------|-----------------|
| Low_glucose rep1  | 10814918  | 61.24%          |
| Low_glucose rep2  | 10578664  | 56.84%          |
| Low_glucose rep3  | 13326344  | 50.12%          |
| High_glucose rep1 | 12416163  | 60.37%          |
| High_glucose rep2 | 10948574  | 58.57%          |
| High_glucose rep3 | 10855263  | 64.97%          |
| <b>Light Poly</b> |           |                 |
| Low_glucose rep1  | 9745454   | 75.83%          |
| Low_glucose rep2  | 13997704  | 76.06%          |
| Low_glucose rep3  | 11453671  | 68.52%          |
| High_glucose rep1 | 10723806  | 73.56%          |
| High_glucose rep2 | 11572776  | 69.51%          |
| High_glucose rep3 | 8762845   | 68.10%          |
| <b>Heavy Poly</b> |           |                 |
| Low_glucose rep1  | 12051978  | 74.58%          |
| Low_glucose rep2  | 9749807   | 74.69%          |
| Low_glucose rep3  | 7871513   | 73.96%          |
| High_glucose rep1 | 8476376   | 73.78%          |
| High_glucose rep2 | 8985906   | 80.24%          |
| High_glucose rep3 | 13196915  | 77.64%          |

B

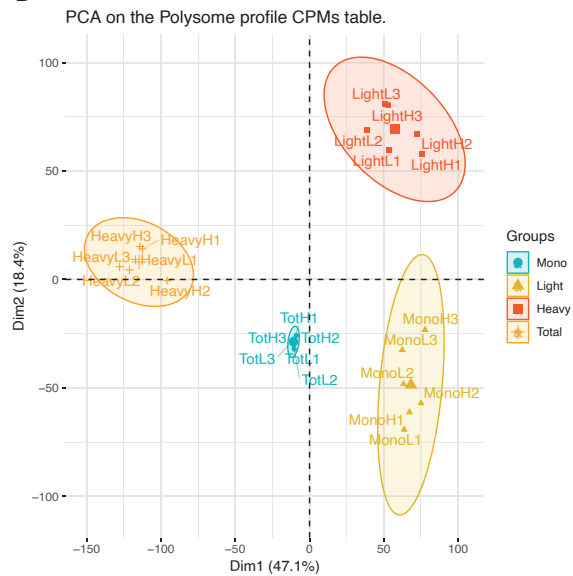

Supp. Fig. 2 - Bulfoni et al.

C

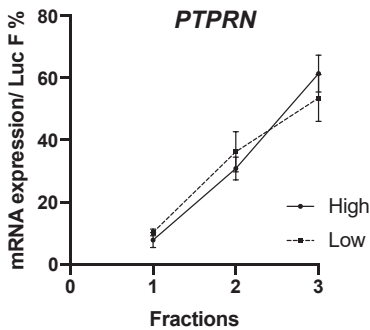

D

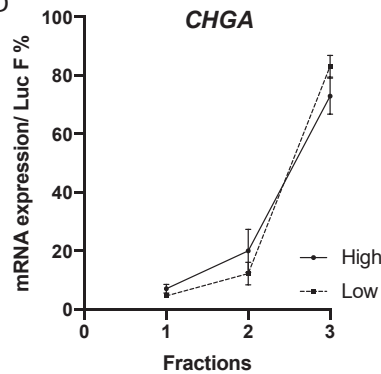

E

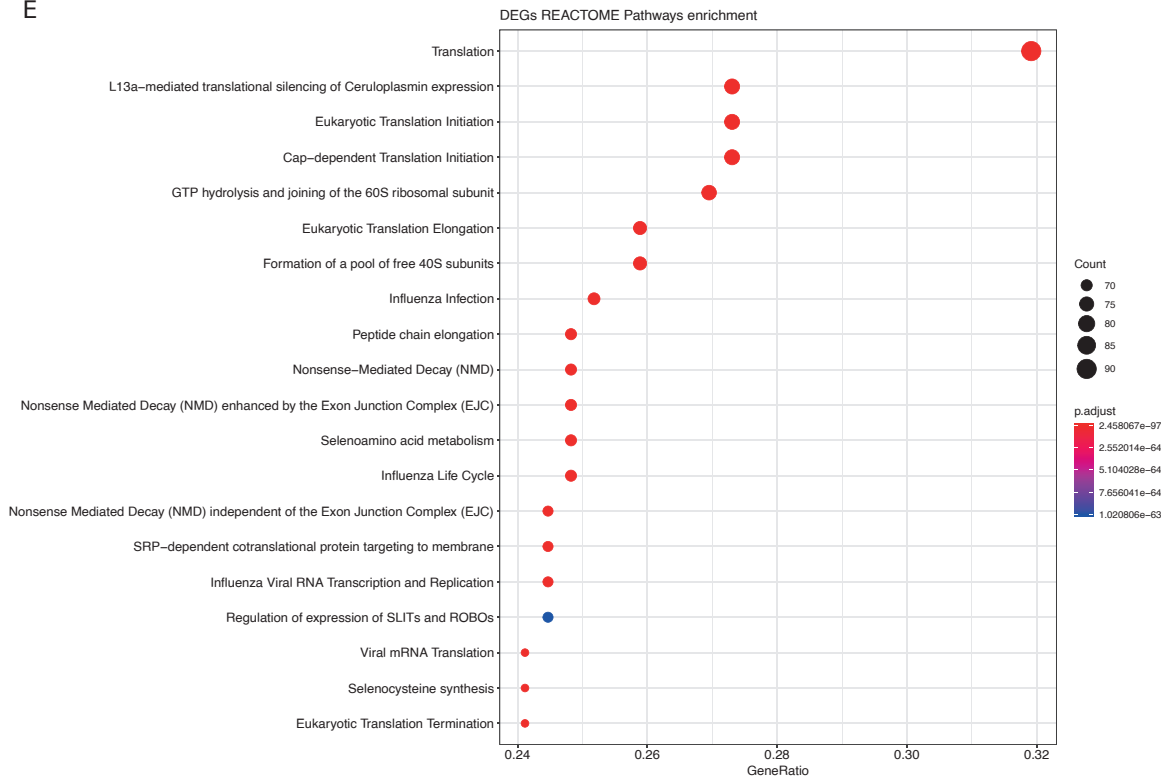

Supplementary Figure 2. A. Table summarizing the number of raw reads and the percentage of uniquely mapped reads for each replicate in each condition. B. PCA analysis of aligned reads from each pool of fractions of the polysome profiling. C-D. RT-qPCR analysis on each of the pool of fractions. E. Dot-plot of the top 20 most significant REACTOME pathways enriched in the differentially translated genes.

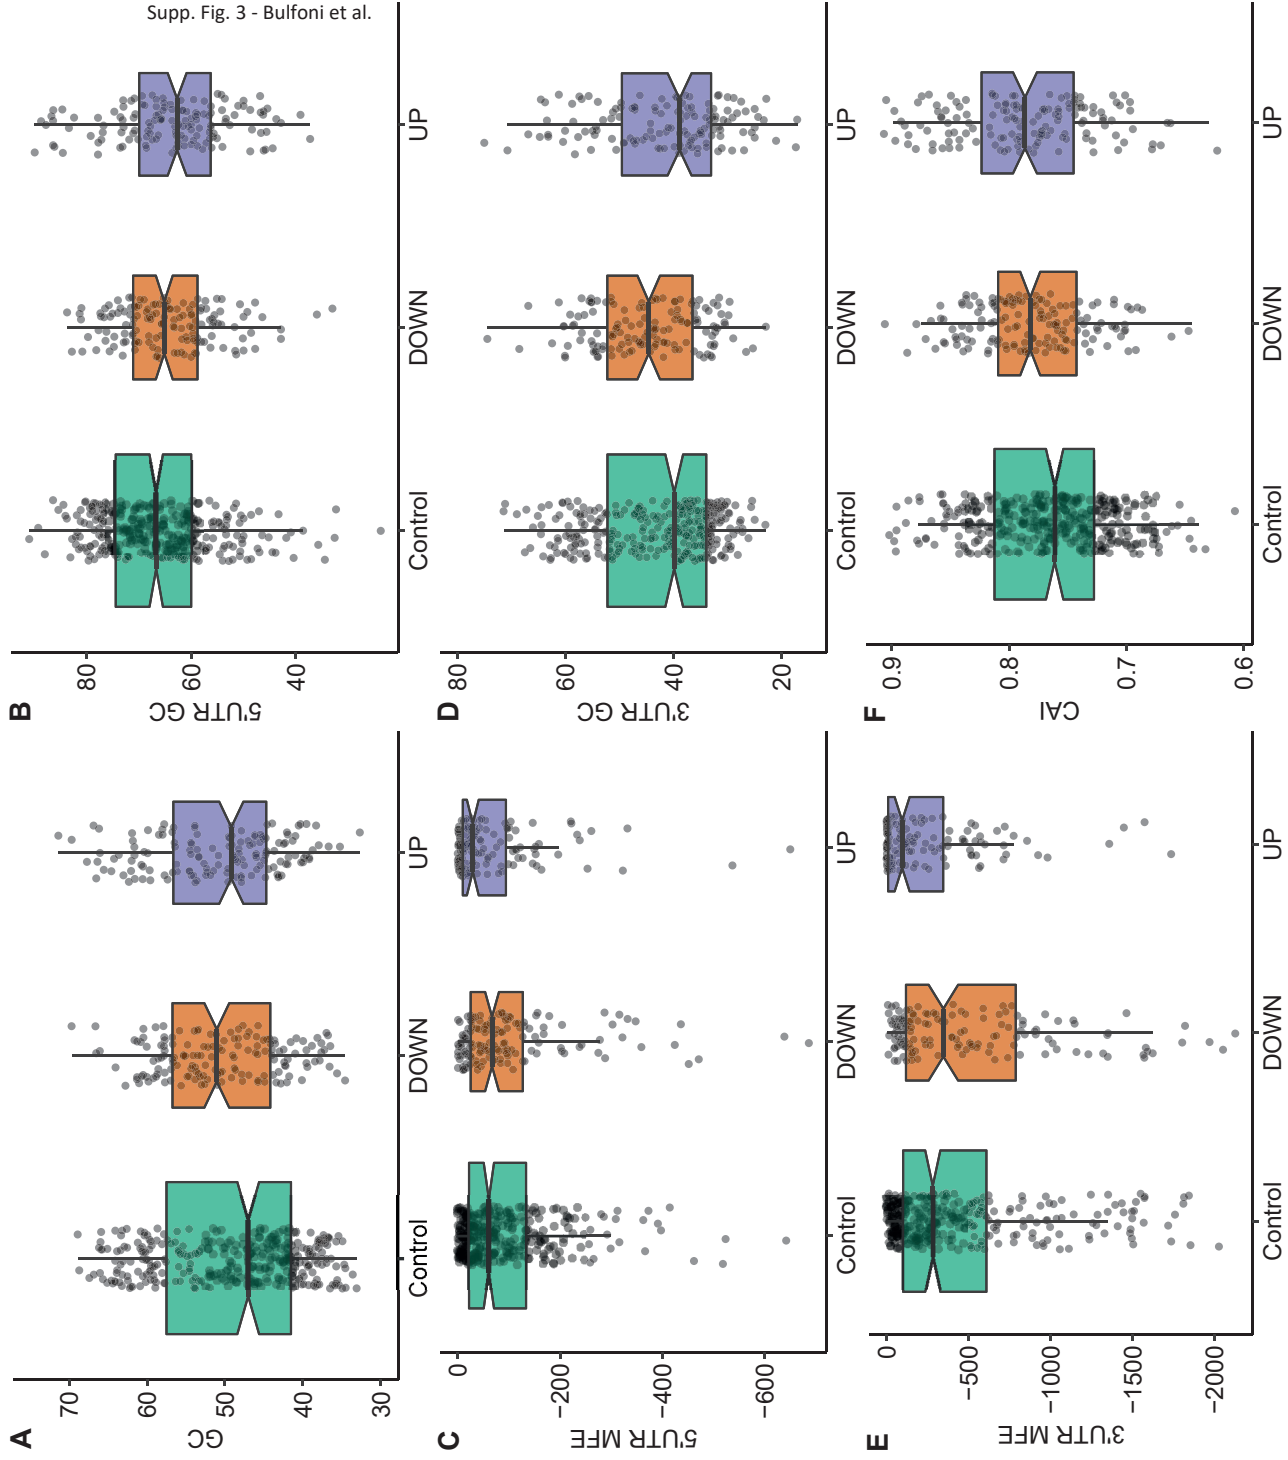

Supplementary Figure 3. mRNA features analyses for 3 groups of mRNAs based on the translation ratio between high and low glucose (see Figure 3)).

**A Coding length distributions of the 6 MClust clusters**

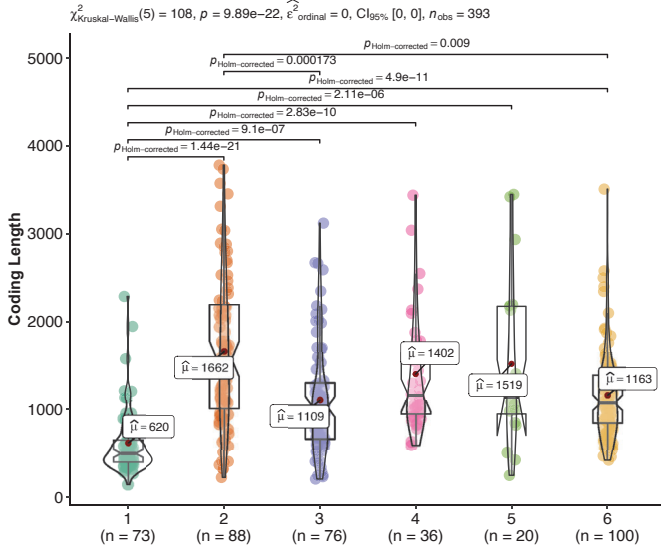

**B GC content distributions of the 6 MClust clusters**

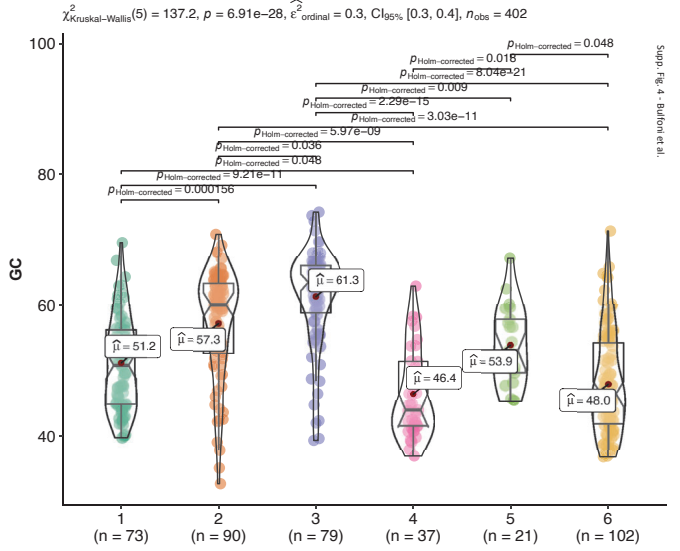

Supp. Fig. 4 - Bullock et al.

**C 5'UTR length distributions of the 6 MClust clusters**

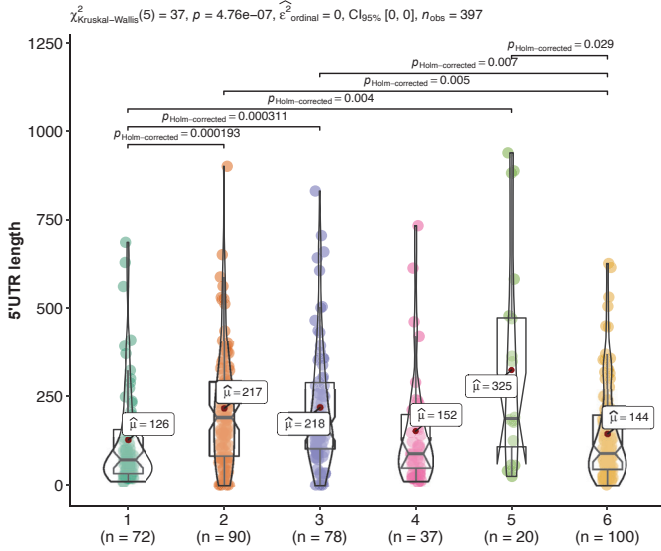

**D 5'UTR GC distributions of the 6 MClust clusters**

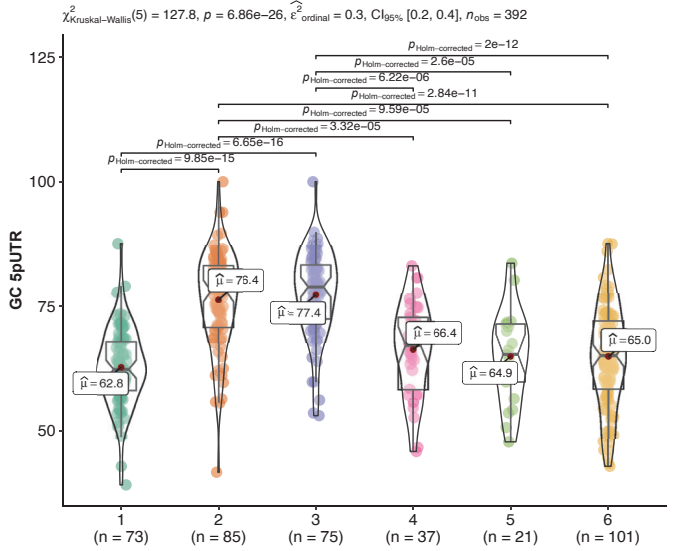

**E 5'UTR MFE distributions of the 6 MClust clusters**

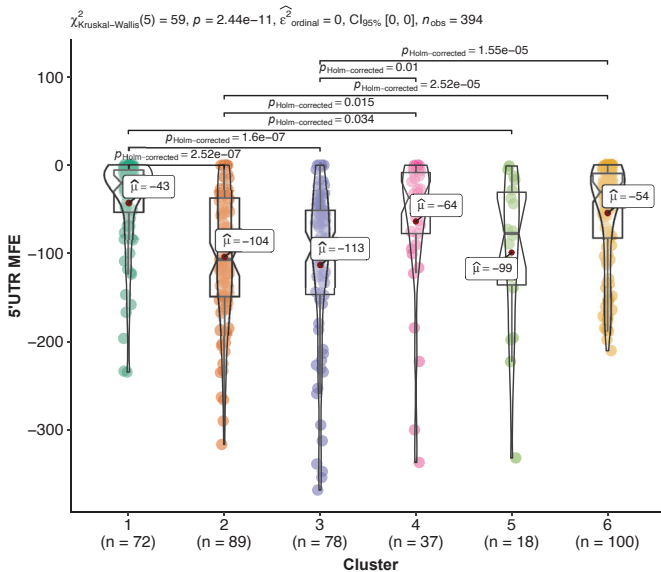

**F MFE per BP 5'UTR distributions of the 6 MClust clusters**

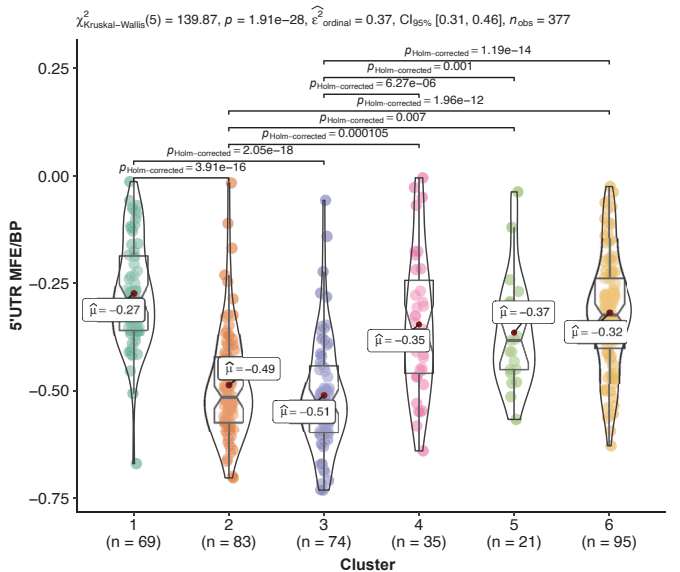



**G 3'UTR length distributions of the 6 MClust clusters**

$\chi^2_{\text{Kruskal-Wallis}}(5) = 27, p = 5.75e-05, \hat{\epsilon}^2_{\text{ordinal}} = 0, \text{CI}_{95\%} [0, 0], n_{\text{obs}} = 370$

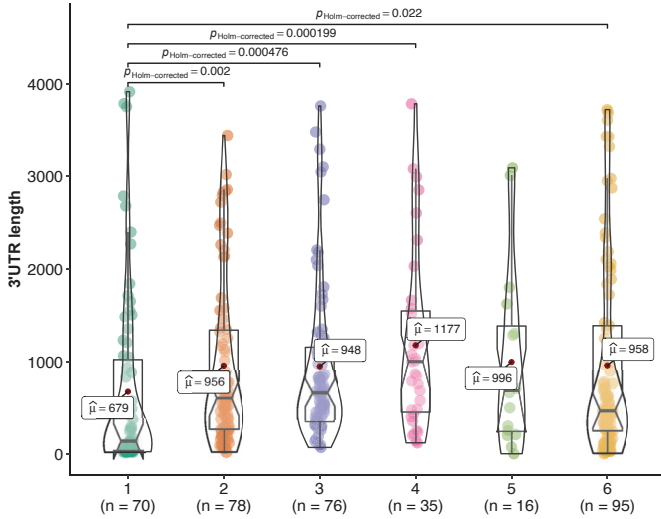

**H GC 3'UTR distributions of the 6 MClust clusters**

$\chi^2_{\text{Kruskal-Wallis}}(5) = 110.9, p = 2.61e-22, \hat{\epsilon}^2_{\text{ordinal}} = 0.3, \text{CI}_{95\%} [0.2, 0.4], n_{\text{obs}} = 395$

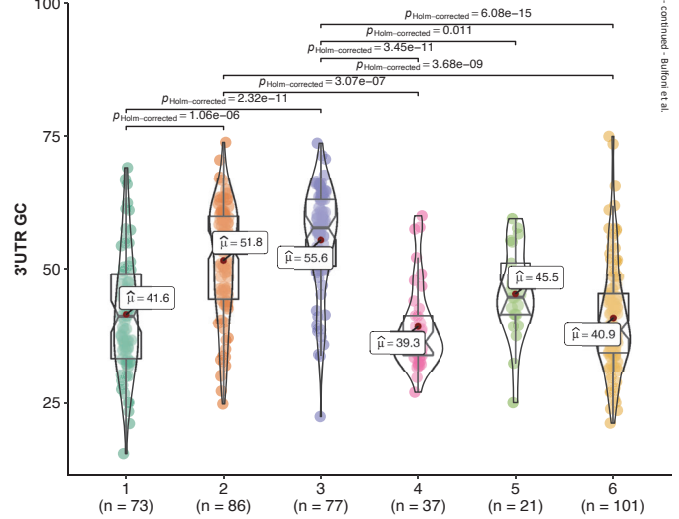

**I MFE 3'UTR distributions of the 6 MClust clusters**

$\chi^2_{\text{Kruskal-Wallis}}(5) = 30, p = 1.49e-05, \hat{\epsilon}^2_{\text{ordinal}} = 0, \text{CI}_{95\%} [0, 0], n_{\text{obs}} = 371$

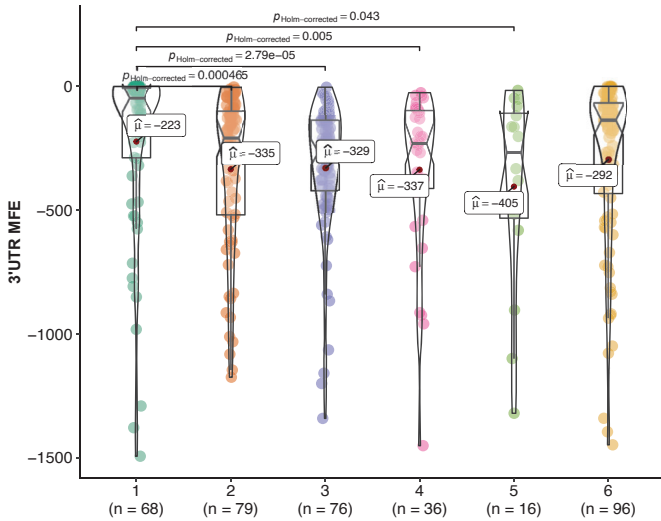

**J MFE per BP 3'UTR distributions of the 6 MClust clusters**

$\chi^2_{\text{Kruskal-Wallis}}(5) = 91.69, p = 2.96e-18, \hat{\epsilon}^2_{\text{ordinal}} = 0.25, \text{CI}_{95\%} [0.17, 0.34], n_{\text{obs}} = 371$

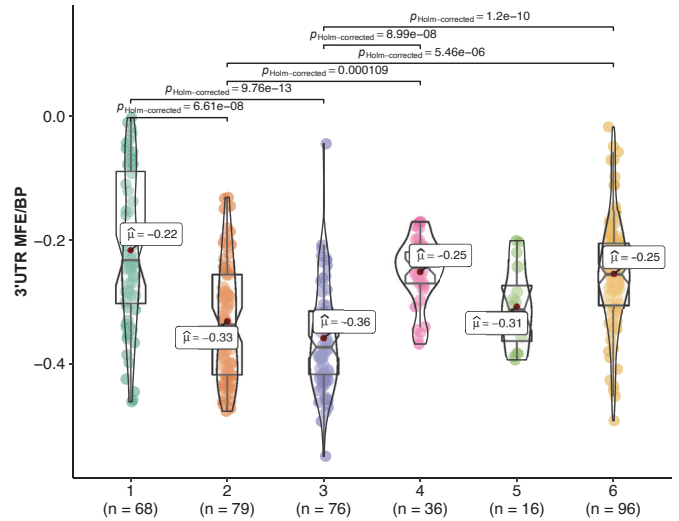

**K TOP local score distributions of the 6 MClust clusters**

$\chi^2_{\text{Kruskal-Wallis}}(5) = 41.7, p = 6.68e-08, \hat{\epsilon}^2_{\text{ordinal}} = 0.1, \text{CI}_{95\%} [0.1, 0.2], n_{\text{obs}} = 402$

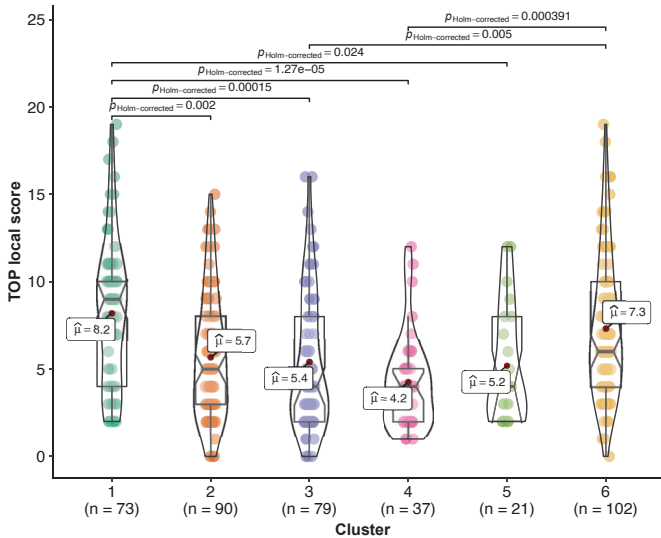

**L CAI distributions of the 6 MClust clusters**

$\chi^2_{\text{Kruskal-Wallis}}(5) = 69.92, p = 1.07e-13, \hat{\epsilon}^2_{\text{ordinal}} = 0.17, \text{CI}_{95\%} [0.11, 0.27], n_{\text{obs}} = 402$

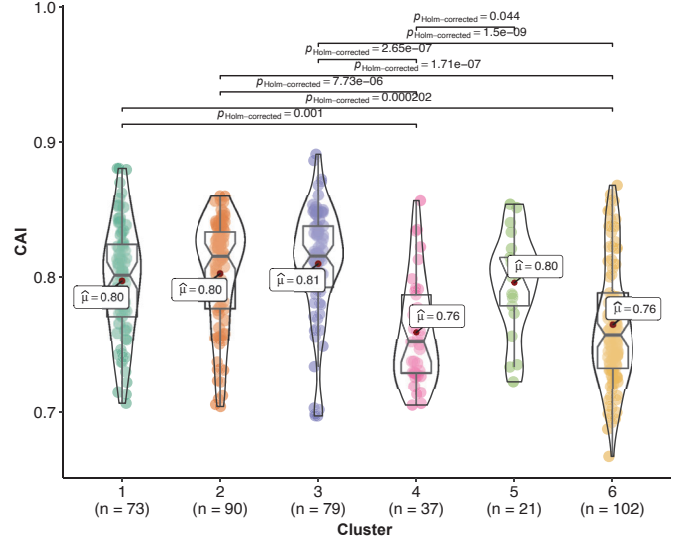

Supplementary Figure 4 : Full set of boxplots and statistical analyses for all 12 mRNA features. Each plot corresponds to an analysis of a particular feature for all the 6 clusters of translation behaviour. The Kruskal-Wallis H-test is used for all the group comparisons to test for median differences with the Dunn test for each pairwise comparison. The test statistics are shown in the subtitle and each significant pairwise comparison (corrected for multiple testing) is plotted only for significant pairwise differences

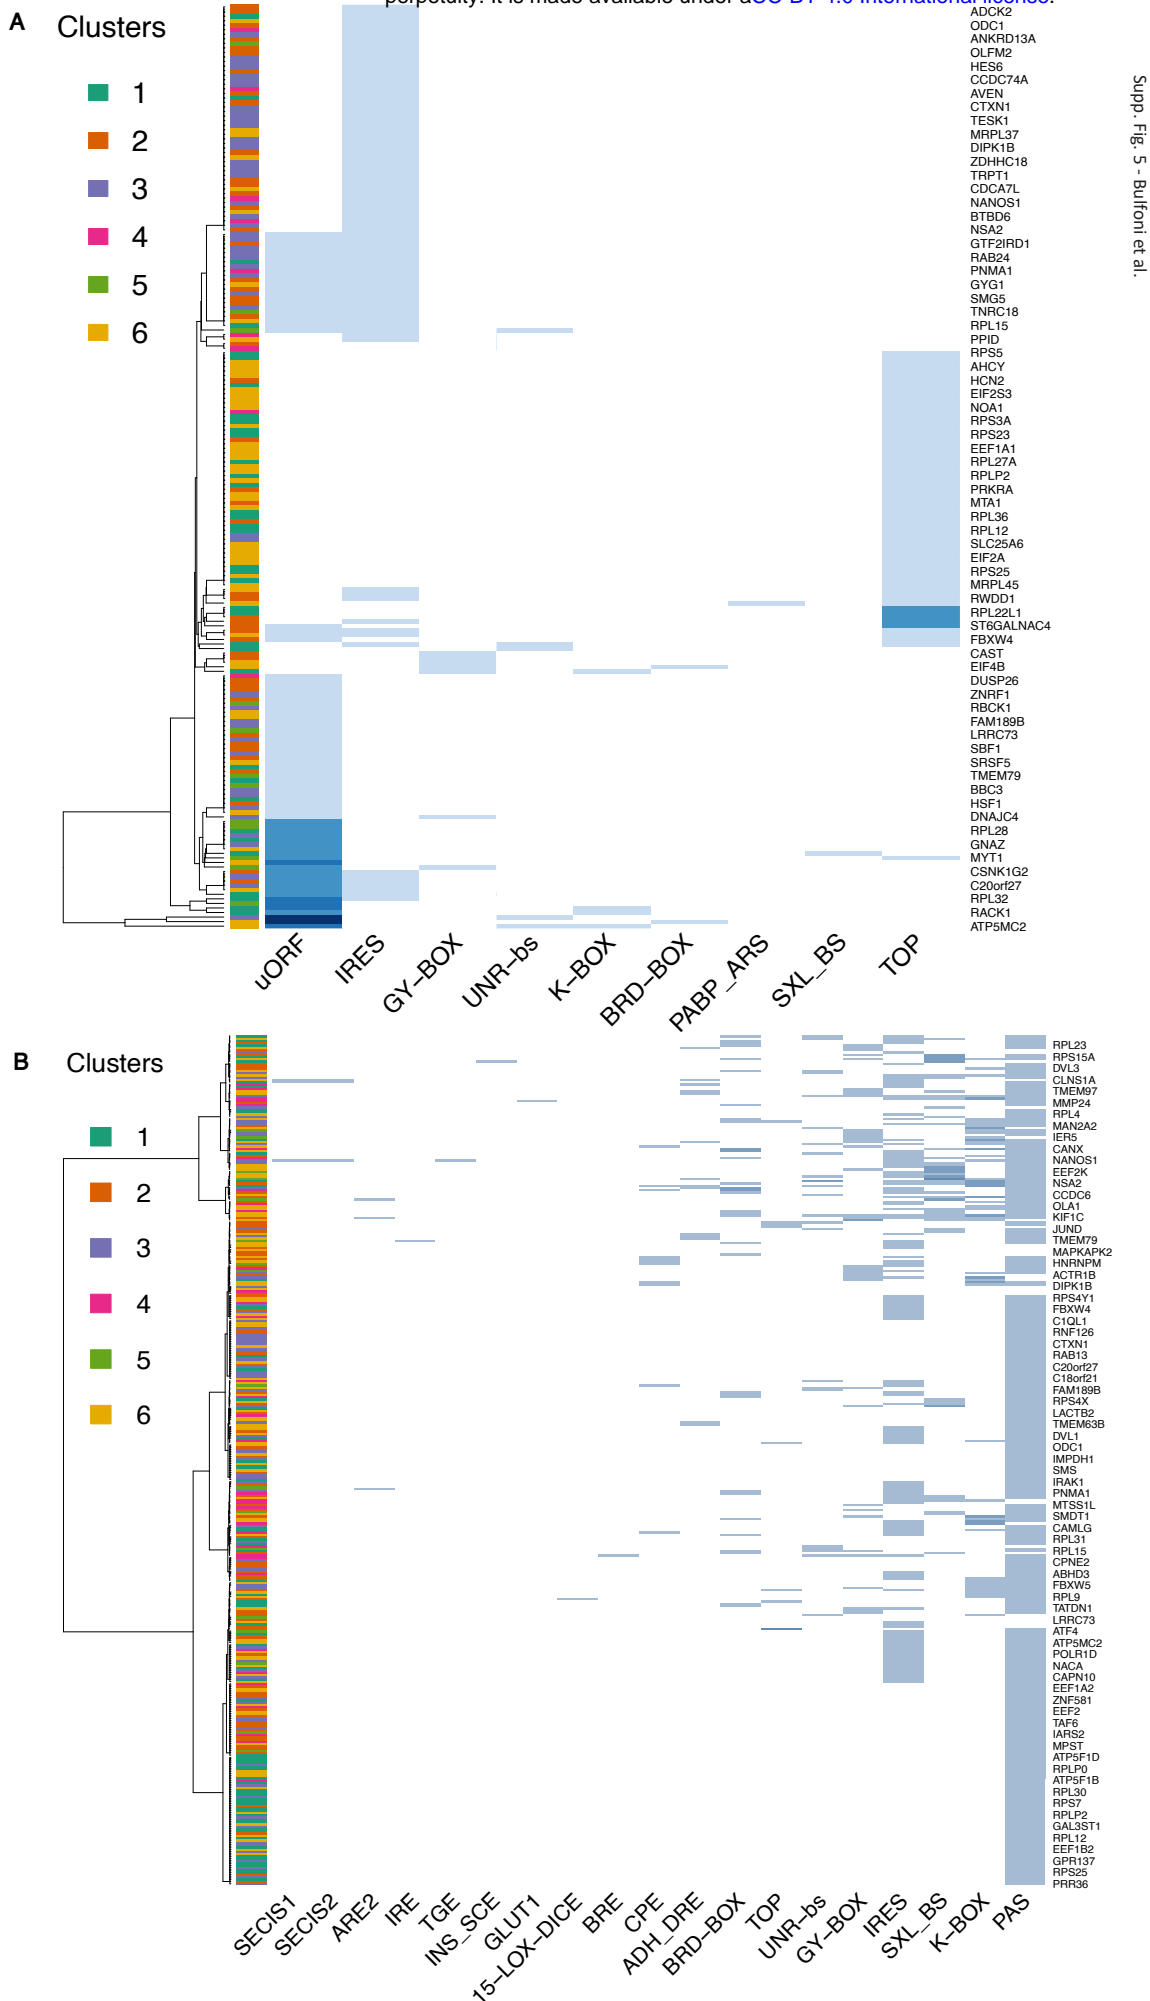

Supplementary Figure 5. Functional motifs analysis of the 5'UTRs (A) and 3'UTRs (B) by interrogating the UTRdb. Ensembl IDs of transcripts are indicated on the right side, ordering of the transcripts was done by clustering of features.

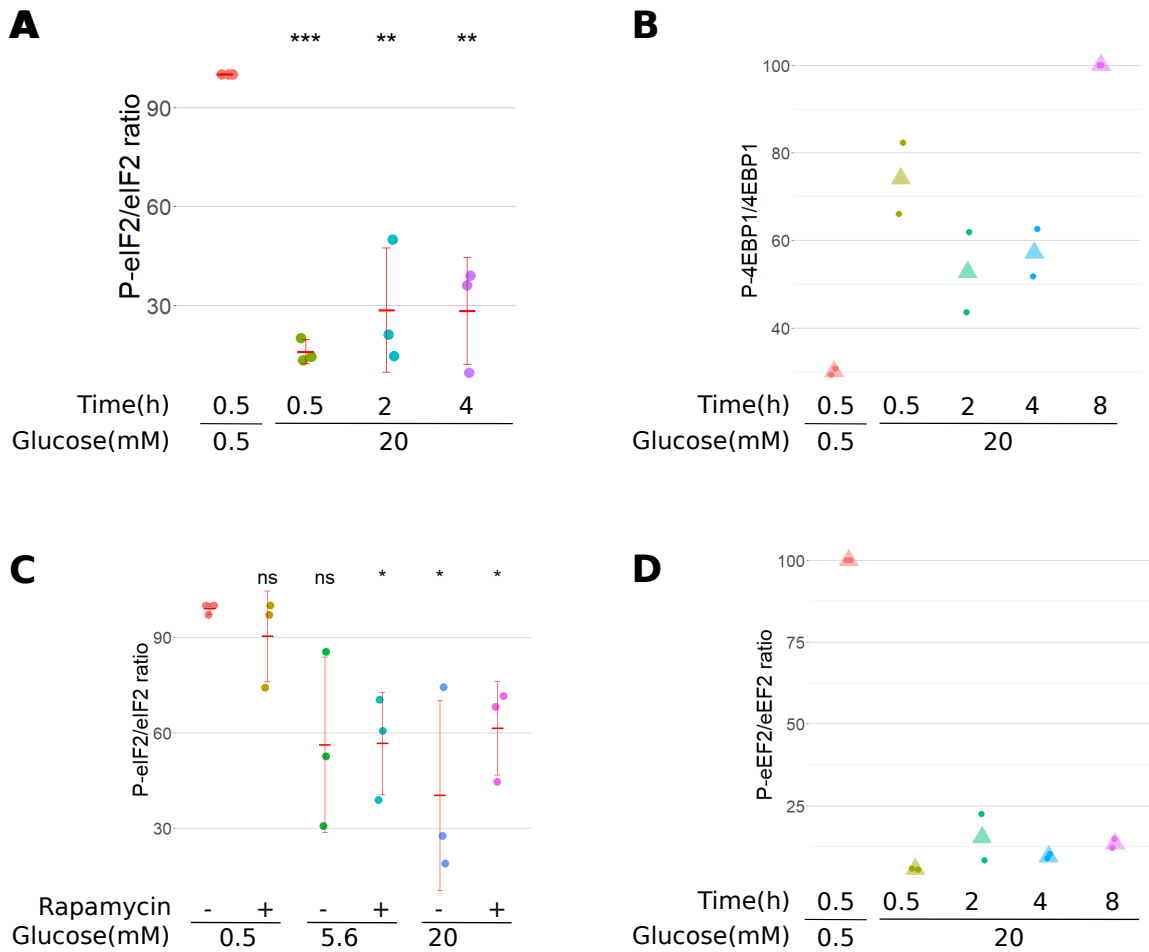

Supp. Fig. 6 - Bulfoni et al.

Supplementary Fig. 6 : Quantification of the Western Blots of Fig. 7 : A (data from Fig. 7A), C (from Fig. 7D): Numerical values of triplicates are shown along with the mean (horizontal red dash) +/- SD (vertical red line) with pairwise comparison against condition 0.5 mM (Student's t test; \*, p<0.05, \*\*, p< 0.001, \*\*\*, p<0.0001). B (from Fig. 7B), D (from Fig. 7E) : Numerical values of duplicates are shown along with the mean (triangles).
